# Supplementary material for: Epiphytic bryophyte biomass estimation on tree trunks and upscaling in tropical montane cloud forests
Source: PeerJ. 2020 Jun 12;8:e9351. doi: 10.7717/peerj.9351 (PMC7295022; doi:10.7717/peerj.9351)
Supplement: Supplemental Information 2 [file peerj-08-9351-s002.xlsx]

## Sheet: Fig.2
Sample	Taxon	Division	Group	Depth (cm)	EB biomass density (g cm-2)
1	Bazzania praerupta (Reinw. Blume, & Nees) Trev.	Marchantiophyta	liverwort	3.55	0.03318
2	Schistochila acuminata Steph.	Marchantiophyta	liverwort	6.15	0.05843
3	Bazzania praerupta (Reinw. Blume, & Nees) Trev.	Marchantiophyta	liverwort	7.22	0.0636
4	Bazzania praerupta (Reinw. Blume, & Nees) Trev.	Marchantiophyta	liverwort	7.17	0.04093
5	Dicranodontium denudatum (Brid.) Britt.	Bryophyta	moss	5.21	0.03301
6	Hypnum pallescens (Hedw.) P. Beauv.	Bryophyta	moss	2.63	0.0128
7	Bazzania magna Horik.	Marchantiophyta	liverwort	4.75	0.01747
8	Pseudospiridentopsis horrida (Card.) M. Fleisch.	Bryophyta	moss	4.19	0.01169
9	Wijkia surcularis (Mitt.) H.A. Crum	Bryophyta	moss	3.56	0.02404
10	Bazzania praerupta (Reinw. Blume, & Nees) Trev.	Marchantiophyta	liverwort	7.48	0.04504
11	Lichen	Mycophycophyta	lichen	5.61	0.02151
12	Dicranum japonicum Mitt.	Bryophyta	moss	3.62	0.02537
13	Pyrrhobryum latifolium (Bosch & Sande Lac.) Mitt.	Bryophyta	moss	2.82	0.02798
14	Bazzania bidentula (Steph.) Steph. ex Yasuda	Marchantiophyta	liverwort	2.23	0.03719
15	Pseudospiridentopsis horrida (Card.) M. Fleisch.	Bryophyta	moss	2.81	0.04798
16	Wijkia surcularis (Mitt.) H.A. Crum	Bryophyta	moss	3.21	0.02243
17	Bazzania fauriana (Steph.) Hatt.	Marchantiophyta	liverwort	2.87	0.0245
18	Lepidozia vitrea Steph.	Marchantiophyta	liverwort	0.88	0.02081
19	Lepidozia vitrea Steph.	Marchantiophyta	liverwort	3.78	0.02871
20	Lepidozia vitrea Steph.	Marchantiophyta	liverwort	4.21	0.04716
21	Lepidozia vitrea Steph.	Marchantiophyta	liverwort	2.42	0.03277
22	Lepidozia vitrea Steph.	Marchantiophyta	liverwort	3.81	0.05174
23	Lepidozia vitrea Steph.	Marchantiophyta	liverwort	4.39	0.05536
24	Lepidozia vitrea Steph.	Marchantiophyta	liverwort	4.32	0.03869
25	Lepidozia vitrea Steph.	Marchantiophyta	liverwort	4.65	0.05132
26	Pyrrhobryum latifolium (Bosch & Sande Lac.) Mitt.	Bryophyta	moss	3.25	0.0283
27	Bazzania oshimensis (Steph.) Horik.	Marchantiophyta	liverwort	2.66	0.01863
28	Lepidozia vitrea Steph.	Marchantiophyta	liverwort	1.81	0.01783
29	Lepidozia vitrea Steph.	Marchantiophyta	liverwort	3.39	0.01754
30	Lepidozia vitrea Steph.	Marchantiophyta	liverwort	1.42	0.02305
31	Bazzania praerupta (Reinw. Blume, & Nees) Trev.	Marchantiophyta	liverwort	2.24	0.02906
32	Bazzania praerupta (Reinw. Blume, & Nees) Trev.	Marchantiophyta	liverwort	3.62	0.03125
33	Bazzania praerupta (Reinw. Blume, & Nees) Trev.	Marchantiophyta	liverwort	1.71	0.0155
34	Schistochila acuminata Steph.	Marchantiophyta	liverwort	4.71	0.03226
35	Schistochila acuminata Steph.	Marchantiophyta	liverwort	1.41	0.01546
36	Bazzania magna Horik.	Marchantiophyta	liverwort	1.93	0.01993
37	Bazzania fauriana (Steph.) Hatt.	Marchantiophyta	liverwort	4.32	0.04187
38	Bazzania oshimensis (Steph.) Horik.	Marchantiophyta	liverwort	4.75	0.06085
39	Wijkia surcularis (Mitt.) H.A. Crum	Bryophyta	moss	4.56	0.0369
40	Bazzania magna Horik.	Marchantiophyta	liverwort	5.82	0.05688
41	Wijkia surcularis (Mitt.) H.A. Crum	Bryophyta	moss	5.56	0.0695
42	Bazzania praerupta (Reinw. Blume, & Nees) Trev.	Marchantiophyta	liverwort	7.19	0.05676
43	Hypnum plumaeforme Wils.	Bryophyta	moss	4.23	0.0576
44	Bazzania oshimensis (Steph.) Horik.	Marchantiophyta	liverwort	4.41	0.03969
45	Bazzania fauriana (Steph.) Hatt.	Marchantiophyta	liverwort	1.37	0.01353
46	Bazzania praerupta (Reinw. Blume, & Nees) Trev.	Marchantiophyta	liverwort	4.21	0.03533
47	Bazzania tridens var. tridens (Reinw. et al.) Trevis.	Marchantiophyta	liverwort	2.81	0.02276
48	Lepidozia wallichiana	Marchantiophyta	liverwort	1.76	0.01509
49	Bazzania bidentula (Steph.) Steph. ex Yasuda	Marchantiophyta	liverwort	1.21	0.01451
50	Bazzania magna Horik.	Marchantiophyta	liverwort	4.41	0.03933
51	Bazzania praerupta (Reinw. Blume, & Nees) Trev.	Marchantiophyta	liverwort	1.31	0.0102
52	Bazzania magna Horik.	Marchantiophyta	liverwort	5.12	0.04115
53	Bazzania magna Horik.	Marchantiophyta	liverwort	5.12	0.04118
54	Bazzania praerupta (Reinw. Blume, & Nees) Trev.	Marchantiophyta	liverwort	1.92	0.0243
55	Bazzania fauriana (Steph.) Hatt.	Marchantiophyta	liverwort	3.72	0.04204
56	Wijkia surcularis (Mitt.) H.A. Crum	Bryophyta	moss	3.52	0.0406
57	Bazzania magna Horik.	Marchantiophyta	liverwort	6.67	0.04136
58	Bazzania praerupta (Reinw. Blume, & Nees) Trev.	Marchantiophyta	liverwort	5.42	0.04674
59	Bazzania oshimensis (Steph.) Horik.	Marchantiophyta	liverwort	2.41	0.02541
60	Pyrrhobryum latifolium (Bosch & Sande Lac.) Mitt.	Bryophyta	moss	4.71	0.0474
61	Bazzania magna Horik.	Marchantiophyta	liverwort	4.32	0.04358
62	Bazzania oshimensis (Steph.) Horik.	Marchantiophyta	liverwort	4.37	0.038
63	Bazzania praerupta (Reinw. Blume, & Nees) Trev.	Marchantiophyta	liverwort	6.72	0.03225
64	Bazzania praerupta (Reinw. Blume, & Nees) Trev.	Marchantiophyta	liverwort	3.61	0.03376
65	Pyrrhobryum latifolium (Bosch & Sande Lac.) Mitt.	Bryophyta	moss	3.62	0.03082
66	Bazzania oshimensis (Steph.) Horik.	Marchantiophyta	liverwort	5.61	0.03657
67	Pyrrhobryum latifolium (Bosch & Sande Lac.) Mitt.	Bryophyta	moss	2.76	0.0278
68	Bazzania oshimensis (Steph.) Horik.	Marchantiophyta	liverwort	2.21	0.02949
69	Bazzania magna Horik.	Marchantiophyta	liverwort	5.52	0.04514
70	Bazzania praerupta (Reinw. Blume, & Nees) Trev.	Marchantiophyta	liverwort	6.31	0.06674
71	Bazzania praerupta (Reinw. Blume, & Nees) Trev.	Marchantiophyta	liverwort	5.12	0.04355
72	Bazzania praerupta (Reinw. Blume, & Nees) Trev.	Marchantiophyta	liverwort	3.21	0.0406
73	Chandonanthus birmensis	Marchantiophyta	liverwort	3.05	0.01894
74	Bazzania praerupta (Reinw. Blume, & Nees) Trev.	Marchantiophyta	liverwort	4.85	0.0446
75	Bazzania praerupta (Reinw. Blume, & Nees) Trev.	Marchantiophyta	liverwort	4.78	0.0355
76	Bazzania praerupta (Reinw. Blume, & Nees) Trev.	Marchantiophyta	liverwort	6.85	0.04381
77	Bazzania magna Horik.	Marchantiophyta	liverwort	4.79	0.03963
78	Bazzania bidentula (Steph.) Steph. ex Yasuda	Marchantiophyta	liverwort	7.46	0.06828
79	Bazzania praerupta (Reinw. Blume, & Nees) Trev.	Marchantiophyta	liverwort	4.03	0.04121
80	Bazzania praerupta (Reinw. Blume, & Nees) Trev.	Marchantiophyta	liverwort	4.19	0.03821
81	Bazzania fauriana (Steph.) Hatt.	Marchantiophyta	liverwort	3.89	0.0321
82	Bazzania bidentula (Steph.) Steph. ex Yasuda	Marchantiophyta	liverwort	1.32	0.0085
83	Bazzania praerupta (Reinw. Blume, & Nees) Trev.	Marchantiophyta	liverwort	4.62	0.032
84	Cephalozia gollanii	Marchantiophyta	liverwort	2.82	0.0313
85	Bazzania praerupta (Reinw. Blume, & Nees) Trev.	Marchantiophyta	liverwort	1.58	0.0188
86	Bazzania praerupta (Reinw. Blume, & Nees) Trev.	Marchantiophyta	liverwort	1.75	0.0165
87	Bazzania praerupta (Reinw. Blume, & Nees) Trev.	Marchantiophyta	liverwort	0.89	0.0062
88	Bazzania fauriana (Steph.) Hatt.	Marchantiophyta	liverwort	1.36	0.0099
89	Bazzania praerupta (Reinw. Blume, & Nees) Trev.	Marchantiophyta	liverwort	1.71	0.0097
90	Bazzania magna Horik.	Marchantiophyta	liverwort	1.41	0.0064
91	Bazzania praerupta (Reinw. Blume, & Nees) Trev.	Marchantiophyta	liverwort	1.62	0.0075
92	Bazzania praerupta (Reinw. Blume, & Nees) Trev.	Marchantiophyta	liverwort	1.61	0.0096
93	Bazzania praerupta (Reinw. Blume, & Nees) Trev.	Marchantiophyta	liverwort	2.91	0.0098
94	Bazzania praerupta (Reinw. Blume, & Nees) Trev.	Marchantiophyta	liverwort	2.25	0.0119
95	Bazzania magna Horik.	Marchantiophyta	liverwort	1.11	0.0068
96	Pyrrhobryum latifolium (Bosch & Sande Lac.) Mitt.	Bryophyta	moss	3.42	0.0348
97	Bazzania magna Horik.	Marchantiophyta	liverwort	1.21	0.0095
98	Bazzania magna Horik.	Marchantiophyta	liverwort	2.81	0.0318
99	Lepidozia vitrea Steph.	Marchantiophyta	liverwort	1.79	0.0069
100	Bazzania praerupta (Reinw. Blume, & Nees) Trev.	Marchantiophyta	liverwort	1.95	0.0319
101	Bazzania fauriana (Steph.) Hatt.	Marchantiophyta	liverwort	0.34	0.0134
102	Bazzania bidentula (Steph.) Steph. ex Yasuda	Marchantiophyta	liverwort	2.49	0.0135
103	Lepidozia vitrea Steph.	Marchantiophyta	liverwort	1.98	0.0153
104	Bazzania praerupta (Reinw. Blume, & Nees) Trev.	Marchantiophyta	liverwort	3.71	0.0323
105	Bazzania praerupta (Reinw. Blume, & Nees) Trev.	Marchantiophyta	liverwort	2.51	0.0219
106	Bazzania magna Horik.	Marchantiophyta	liverwort	4.77	0.0237
107	Lepidozia vitrea Steph.	Marchantiophyta	liverwort	0.88	0.0082
108	Bazzania oshimensis (Steph.) Horik.	Marchantiophyta	liverwort	2.12	0.0082
109	Lepidozia vitrea Steph.	Marchantiophyta	liverwort	3.51	0.0355
110	Bazzania praerupta (Reinw. Blume, & Nees) Trev.	Marchantiophyta	liverwort	1.62	0.0157
111	Bazzania praerupta (Reinw. Blume, & Nees) Trev.	Marchantiophyta	liverwort	3.02	0.028
112	Bazzania magna Horik.	Marchantiophyta	liverwort	11.56	0.0635
113	Bazzania fauriana (Steph.) Hatt.	Marchantiophyta	liverwort	9.67	0.0843
114	Bazzania magna Horik.	Marchantiophyta	liverwort	11.25	0.0796
115	Bazzania magna Horik.	Marchantiophyta	liverwort	9.2	0.0993
116	Bazzania bidentula (Steph.) Steph. ex Yasuda	Marchantiophyta	liverwort	9.19	0.084
117	Bazzania tridens var. tridens (Reinw. et al.) Trevis.	Marchantiophyta	liverwort	9.32	0.0628
118	Bazzania praerupta (Reinw. Blume, & Nees) Trev.	Marchantiophyta	liverwort	8.99	0.0689
119	Bazzania magna Horik.	Marchantiophyta	liverwort	9.22	0.0517
120	Bazzania magna Horik.	Marchantiophyta	liverwort	9.15	0.0551
121	Bazzania albifolia Horik.	Marchantiophyta	liverwort	10.25	0.0778
122	Bazzania magna Horik.	Marchantiophyta	liverwort	9.72	0.044
123	Bazzania praerupta (Reinw. Blume, & Nees) Trev.	Marchantiophyta	liverwort	9.75	0.0374
124	Bazzania bidentula (Steph.) Steph. ex Yasuda	Marchantiophyta	liverwort	9.13	0.0418
125	Bazzania praerupta (Reinw. Blume, & Nees) Trev.	Marchantiophyta	liverwort	13.67	0.0786
126	Bazzania albifolia Horik.	Marchantiophyta	liverwort	8.99	0.0672
127	Bazzania bidentula (Steph.) Steph. ex Yasuda	Marchantiophyta	liverwort	10.15	0.0742
128	Bazzania angustifolia Horik.	Marchantiophyta	liverwort	11.65	0.0665
129	Bazzania albifolia Horik.	Marchantiophyta	liverwort	13.61	0.0817
130	Bazzania magna Horik.	Marchantiophyta	liverwort	8.95	0.0485
131	Bazzania praerupta (Reinw. Blume, & Nees) Trev.	Marchantiophyta	liverwort	9.65	0.0587

## Sheet: Fig.3(A)
N (cm)	NE (cm)	E (cm)	SE (cm)	S (cm)	SW (cm)	W (cm)	NW (cm)		N:	North
0	0	0.1	0	0	0	0	0		NE:	Northeast
0	0.1	0.21	0	0	0	0	0		E:	East
0	0.09	0.23	0	0	0	0	0		SE:	Southeast
0	0.05	1.45	0	0	0	0	0		S:	South
0	0.06	0.11	0	0	0	0	0		SW:	Southwest
0	0.3	1.99	0	0	0	0	1.12		W:	West
0	0	1.23	0	0	0	0	1.1		NW:	Northwest
0	0	0.52	0	0	0	0	0.98
0	0	0.87	0	0	0	0	0
8.88	0.39	1.32	0.2	7.22	1.28	0	0
6.59	0.41	0.49	1.31	4.51	4.1	0	0
0	0.11	0.59	0.35	0.1	0	0	0
0	0	0	0.16	0	0	0	0
0	0	0.6	0.95	0.62	0.48	0	0
0	0	0.49	0.32	0.95	0	0	0
0	0	0.88	0.61	0.56	0	0	0
0	0	0	0.1	0.1	0	0	0
0	0	0	0.91	1	0	0	0
0.65	0.5	0.5	1.95	0.55	1.02	0	0
0.38	0.71	1.61	1.55	0	0.49	0	0
2.41	0	1.5	1.48	0	1.78	1.01	0.11
1.5	1.58	0	3.9	2.49	0	4.75	0.55
0	0	0	0	0	0	0	0
0.19	0.51	0	0	0	0	0	0
0.25	0.22	0	0	0	0	0	0
0.42	0	0	0	0	0	0	0
1.94	1.1	0	0	0.26	0	0	0
2.89	0	0	0	0	0	0	0
0.21	0.56	0	0	0.11	0	0	0
1.92	2	0.4	0	1.89	0	0	0
0.99	0.71	2.01	0	0.42	0	0	0
5.61	0.95	0.45	2.3	1.75	3.98	0	0
1.72	1.38	0.38	4.1	7.01	6.45	0	0
0.45	0.12	0	2.56	0	0	0	0
0	0.71	0	1.15	0	0	0	0
0	1.41	0	1.38	0	0	0	0
0	0	0	2.23	0	0	0	0
1.51	0	0	4.72	0	0	0	0
0	0.51	0	1.31	0	0	0	0
0	0.62	0.3	1.25	0	0	0	0
0	0.82	0.11	0.5	0	0	0	0
0	1.56	0.12	0.56	0	0	0	0
0	1.44	0	0	0	0	0	0
0	2.31	0	0	0	0	0	0
3.62	0.59	0	0	0	2.68	1.62	5.36
1.56	1.52	0	0	0.22	3.5	1.01	6.22
3.01	0.51	0	0	0.2	6.12	0.51	6.21
0	0.19	0	0	0.23	0	0.62	4.77
0.56	0.15	0	0	0.61	1	2.62	1.02
1.58	2.99	0	0.5	0.82	0	2.89	7.12
5.52	5.48	0	0.41	0.49	0	1.67	7.45
4.62	3.8	0	0.35	0.49	0	3.24	2.12
2.35	5.14	0.6	0.8	0.25	0	1.9	1.43
2.22	5.26	2.61	1.16	0	0	0.2	0
1.75	6.11	2.5	4.23	0	0	1.05	0.52
0	0	0	0.45	4.45	6.11	3.66	0
0	0	0	1.11	1.25	8.45	5.09	0
0	0	0	0.4	0.78	3.11	9.12	0
0	0	0	0.8	1.99	4.92	5.01	2.56
0	0	0	0.52	2.56	0.59	4.23	0
0	0	0	0.61	1.66	2.99	4.44	3.32
0	0	0	0.51	9.14	0.68	1.01	11.55
1.22	0	0	9.23	0.92	1.72	3.01	1.99
1.03	0	0	0.35	0.49	0.11	0.52	3
0.82	0	2.11	0.21	1.51	0.89	0.63	1.03
0	0	1.82	1.01	1.52	2	0.78	2.24
0	0	0	0	0	1.1	1.71	0.55
0	0	0	0	0	1.42	1.56	1.68
0	0	0	0	0	0.69	2.24	0.65
0	0	0	0	0	1.1	0.4	2.23
0	0	0	0	0.3	0.45	0.69	2.51
0	0	0	0	1.19	0.95	0.24	1.21
0	0	0	0	2.05	5.1	1.31	0
0.2	0	0	0	3.13	6.24	2.2	0
0.21	0	0	0.21	6.7	3.81	8.24	0.1
0.48	0	3.38	3.64	0.82	4.56	1.45	0.13
1.21	2.51	4.5	4.78	1.66	0.7	3.99	0.5
1.42	0	0	0	0	1.15	5.11	2.8
0	0	0	0	0	0.78	5.8	3.31
0	0	0	0	0.62	2.06	4.89	3.52
0	0	0	0	0.82	3	4.72	3.12
0	0	0	1.41	2.54	3.21	3.64	2.51
0	0	0.44	0	2.12	3	4.66	2.3
0	0	0.81	0	3.2	5.42	2.38	1.25
0	0	2.4	0	6.68	3.21	2.4	1.41
0	0	0.42	0	10.04	5.66	1.79	1.5
1.05	0	0.32	0	13.56	8.5	3.51	5.41
3.82	3.5	6.69	0	3.49	5.2	7.41	8.36
0	0	0	0	0	0	0.05	0.51
0	0	0	0	0	0.24	0.1	0.9
0	0	0	0	0	0	0.1	1.58
0	0	0	0	0	0.16	0.72	1.45
2.21	0	0	0	0	0.81	1.38	0.71
0	0	0	0	0	0	1.41	2.8
0	0	0	0	0	0.249	2.61	0
0	0	0	0	0.31	2.4	4.49	10.77
0	0.9	0	0	2.25	6.21	3.57	0
0	1.54	0	0.25	2.31	5.41	2	0
0	12.23	0	1.97	2.35	1.25	0.29	0
0	0.4	0	2.56	3.1	1.12	0.25	0
0.1	0	0	2.16	0.51	4.25	0.25	0.1
0.1	0.2	0	2.2	3.71	4	0.4	0.1
0.1	0	0	2.37	3.21	8.23	0.51	0
0	0	0	3.56	1.78	6.25	1.12	0
0	0	2.32	4.24	5.72	5.12	2.7	0
0	0	0	0.21	0.71	6.5	0.2	0
0	0	0	3.32	0	3.61	0.2	0
0	0	0	1.68	2.78	4.82	3.7	0
0	0	0	6.82	1.02	1.54	5	0
0	0	0	12.71	0.41	3.01	3.5	0
0	0	1.55	1.9	1.78	3.25	5.51	0
0	0	3.69	0.81	1.59	3.41	0	0
0	0	1.43	2.1	2.25	2.74	0	0
0	0	5.12	3.09	2.12	4.22	0	0
0	0	3	3.12	3.5	3.65	0	0
0	0	5.07	4.58	4.31	4.91	0	0
0	0	1.71	0.71	8.51	6.5	0	0
0	0	0	4.78	7.42	6.72	0	0
0	0	3.6	4.5	5.51	10.5	0	0
0	2.1	7.51	2.5	4.12	0	0	2.32
0	2.49	2.2	4.12	0.62	0	0	3.1
0	0	0	0	0	2.56	6.66	4.2
0.6	0	0	0	1.23	0.41	5.12	4.15
0.91	0	0	0	2.78	0	4.32	5.23
1.82	0	0	0.6	2.62	0	2.65	5.22
2.51	0	0	0	6.54	2.51	3.11	3.71
2.23	0	0	0	4.49	1.24	0.76	5.56
4.01	1.56	0	1.42	1.23	0.51	1.02	4.64
5.06	3.25	0	0.31	6.1	2.24	3.66	6.45
7.25	5.38	0	0.68	1.12	0.51	3.54	3.21
6.53	8.91	3.15	1.52	0	2.72	0.53	5.12
5.21	8.1	3.51	0.68	1.23	0.5	2.61	2.1
0.22	3.57	0	0	0	2.15	1.12	0.61
0.68	3.48	0	0	0	2.23	1.54	0.78
2.32	2.12	0	0	0	1.56	1.41	1.48
2.15	1.35	0	0	0	2.1	2.95	1.95
7.15	2.99	0	0	0	2.11	2.51	9.23
8	1.12	0	0	0	2.12	4.12	11.22
9.12	1.5	1.18	0	0	2.15	3.15	10.54
12.23	5.98	5.67	0	0	3.41	6.51	2.41
1.15	6.65	8.65	0	0	3.72	2.12	13.5
5.68	13.23	8.57	0	0	2.12	2.51	7.15
7.51	12.12	9.1	0	0	3.15	6.45	6.9
1.39	0	0	0	0	0.4	6.41	3.56
0.4	0	0	0	0	0.36	2.15	2.61
0.68	0	0	0	0	0.18	1.99	2.15
1.4	0	0	0	0	0.1	1.4	0.51
0.21	0	0	0	0	0.15	1.46	0.61
4.21	0.2	0	0	0	0	1.68	1.42
1.8	1.39	0.15	0	0.45	0.21	0.56	1.56
1.15	1.32	0	1.25	2.61	1.25	1.5	4.23
1.36	2.3	1.45	2.54	3.14	1.78	4.01	7.71
2.4	4.21	1.97	2.4	1.56	1.24	0	1.39
0.71	11.22	4.56	2.66	0.52	3.12	0	1.05
0.71	0.4	0.55	1.59	4.82	2.2	1.49	2.5
2.88	0.19	0.37	1.2	2.78	1.8	1.7	2.31
2.69	2.19	0.72	2.6	1.68	1.5	1.68	2.5
2.6	0.15	0.49	2.61	2.4	1.61	1.77	1.5
1.3	0.75	0.15	0.6	2.15	2.11	2.53	0.9
2.42	0.11	0.88	1.1	2.71	2.71	1.35	2.14
0.71	1.2	0	2.8	2.14	2.4	1.39	2.1
0.48	1.22	0.11	1.12	2.85	1.35	1.2	2.5
2.12	0.78	0.46	2.49	2.41	2.66	1.78	1.5
1.29	7.22	3.21	3.2	2.9	0.62	0.6	1.11
1.5	2.59	2.45	0.99	0.39	2.1	2.05	2.11
1.81	0.49	0	0.19	1.74	0.5	1.9	1.75
1.4	0.55	0	0.36	1.1	2.1	1.65	1.21
1.22	0.5	0	0.21	2.63	1.25	1	1.95
0.2	1.55	0	0.2	0.52	1.12	1.62	1.81
0.41	0.35	0.2	0.15	1.12	1.42	2	3.11
2.11	1.66	0.55	0.5	1.21	2.4	1.22	3.32
0.81	0.9	0.12	0.41	1.72	2.12	1.38	1.61
0.99	1.5	0.81	0.65	1.95	2.6	1.1	2.61
0.7	0.82	1	1.1	2.15	1.6	1.32	1.99
0.65	0.31	2.61	2.5	2.65	2.4	1.6	1.75
2.11	1.1	3.82	4.11	3.71	2.66	0.92	0.8
3.12	0	0	0	1.85	1.15	0.45	0.75
2.05	0.32	0	0	2	1.72	0.71	1.8
1.01	0.3	0	0.45	2.57	1.65	0.81	1.75
1	0.2	0.15	0.31	1.5	1.59	1.65	1.75
2.12	0.45	0.21	0	2.78	1.35	1.5	2
3.15	0.4	0.2	0	1.25	1.4	2.35	1.72
2.85	0.45	0.7	1.56	1.72	1.66	1.25	2.15
2.51	0.38	0.25	1.12	5.67	1.11	2.65	3.45
2.62	0.24	0	0	2.41	1.65	1.75	2.45
4.51	0.25	0	1.15	3.6	2.32	1.52	2.15
2	0.65	0	1.12	2.75	1.65	0.61	1.5
0.7	0.75	0	0	1.35	0.65	0.65	2.11
0.56	0.4	0	0.6	1.4	1.67	1.12	3.52
0.25	0.42	0	1.35	1.15	1.45	0.21	1.85
0.35	0.5	0.22	3.51	1.52	1.32	2.42	1.9
0.4	0.21	2.67	4.02	1.9	1.7	2.56	2.21
0.39	1.49	1.98	0.49	1.12	1.35	1.21	1.1
0.5	0.51	1.56	1.56	1.05	2.25	1.24	1.48
0.51	0.49	1.5	2.5	1.5	1.25	1.65	1.35
0.33	0.66	1.72	1.99	1.49	1.82	1.54	2.19
0.4	0.11	2.72	1.45	1.62	2.11	0.98	3.4
0.61	0.67	3.11	1.32	1.85	1.95	0.57	0.92
1.12	1.57	0	0.5	0.91	1.14	1.32	1.49
1.1	0	0	0.71	2.32	0	1.24	1.35
1.32	1.52	0.5	0.62	1.62	1.37	0.68	2.57
0.95	0	0.68	0.89	2	2.52	2.01	2.32
1.5	0.89	0.66	1.72	3.75	2.44	1.71	3.67
2.32	0.21	0.11	0.68	1	1.25	1.42	4.32
5.78	0.33	0.66	0.35	0.72	1.32	1.12	3.1
5.67	0.21	0.45	0.14	0.5	2.14	1.61	1.72
5.71	0	0.82	0.18	1.19	1.32	2.15	2.54
3.61	0.25	0.5	0.62	1.19	1.49	2.1	3.74
4.32	0.45	1.61	1.1	0.62	1.1	0.61	2.49
1.55	0	0	0	0.61	1.31	1.12	1.7
2.34	0	0	0	1.12	0.52	1.21	1.42
1.71	0	0	0	6.21	1.2	1.3	2.21
0.51	0	0	0	0.51	1.81	2	3.7
0.65	0	0	0	0.35	1.43	1.16	1.5
2.33	0	0	0	2.31	1.89	4.12	1.31
0.71	0	0	0	3.12	2	2.14	2.55
0.61	0	0.88	0.62	3.52	2.58	1.15	1.7
0.71	0.61	2.49	2.11	1.13	1.71	2.01	7.01
2.72	0.12	2.5	2.12	1.19	0.62	1.15	4.5
4.12	3.31	3.71	1.5	1.71	0.5	7.85	1.88
0.5	0	0.52	1.52	1.21	1.49	1.65	1.35
2.12	0	0.41	1.05	3.3	2.24	1.55	2.5
2.5	0	0.42	0.81	1.81	2.15	2.11	4.89
1.48	0	0.35	0.62	1.01	4.15	1.72	3.43
1.61	0	0.9	0.23	3.22	1.02	1.55	2.95
1.82	0.05	0.5	0.12	1.2	1.12	1.41	2.99
0.66	0.1	0.82	1.11	1.52	0.98	3.52	3.8
2.1	0	0.41	0.6	1.61	2	0	2.11
3.33	0.1	0.4	0.58	2.15	2.23	1.82	5.5
1.5	1.55	0.65	1.5	1.78	2.2	0.85	3.12
2.32	4.1	0.65	1.21	2.6	1.01	2.21	2.12
2.21	0	0	0	2.99	1.12	1.21	2.1
2.4	0	0	0	2.78	3.51	0.45	4.99
1.4	1.21	0.21	0.25	1.6	2.35	2.11	2.12
1.89	0.81	0	0.11	2.2	4.32	1.49	2
1.54	0.45	0	0	2.12	2.51	0.99	4.95
1.1	0.85	0	0.55	2.24	3.32	1.15	4.6
1.32	0.2	0	0.1	0.72	7.42	0.44	5.01
6.99	2.19	0	0.15	0.5	5.45	1.95	4.87
3.95	0.21	0.12	0.35	1.21	7.5	0.61	4.82
1.6	2.99	1.24	1.49	1	2.22	0.5	4.01
2.75	3.43	0	3.78	2.65	1.01	0	5.9
0.2	0.66	0.35	0.61	0.24	0.32	0.61	0.61
1.6	0.1	0.07	0.51	0.6	1.15	0.67	0.3
0.3	0.51	0.21	0	0.61	0.61	0	0.23
0.15	0.52	0.11	0.22	0.52	0.22	0	0
0.31	0.3	0.15	0.12	0.61	1.18	0.32	0.12
1.35	0.42	0.19	0.32	0.38	0.7	0.5	0.11
1.72	1	0.1	0.49	0.22	0.42	0.91	0
3.31	1.95	0.13	0.51	0	0.5	0.82	0.61
3.02	3.5	0.15	0.2	0	0	0	0.51
1.5	4.33	1.24	1.13	0	0	0	0
3.47	2.13	5.01	2.15	0	0	0	0.77
0.37	0	0	0	3.5	0.49	0.1	1.25
0.1	0	2.67	1.21	1.95	2.68	0.99	0
0.56	0.41	1.45	1.67	1.23	0.68	1.18	0.33
0	0	0.26	1.82	1.32	1.16	0.4	0.32
0.71	0	0	0	2.15	4.25	1.72	2.02
2.11	0.78	0.21	0	0.12	1	1.12	0.52
0.72	0.76	0.22	0	0.25	1	0.82	0.37
0.71	0	0	0	1.66	1.68	1.99	1.59
3.2	0.97	0.4	1.22	2.67	5.11	1.34	1.74
0.51	0.69	0.3	1.34	2.68	0.57	1.11	0.5
2.71	1.21	0.36	1.32	1.3	1.56	4.5	1.65
0.1	1.5	0.25	0.2	0	0	0	0
0.5	1.18	0.1	0.62	0	0.09	1.12	0.01
0	0.25	0.6	0.5	0	0	0.39	0.82
0.7	0.51	0.29	1.35	0	0	0.71	0.12
0.11	0.21	3.56	0	0.15	0	0.1	0
0.85	0.42	0.24	0	0	0	0	1.05
1.2	0.9	0	0.3	0	0.27	2.25	1.03
1.02	1.4	0	0	0	1.25	1.71	1.02
1.35	3.75	0	0	0	0.62	3.21	3.01
3.56	0	0	0	0	1.02	2.01	1.95
1.78	1.69	0	1.49	2.68	1.58	0.31	0.99
0.8	0	0	0	0	0	0.75	0
1.35	0	0	0	0	0	1.62	0.21
1.2	0	0	0	0	0	3.05	1.8
1.05	0	0	0	0	0	1.12	0.9
1.5	0	0	0	0	0	0.21	2.95
0.1	0	0	0	0	0.51	1.62	4.72
0.78	0	0	0	0	0.2	1.22	5.72
0.9	0	0	0	0	0	1.95	6.12
4.26	0	0	0	0	0.31	1.68	8.26
0	2.23	0	0	0	0.41	1.82	0
2.61	8.72	3.52	0	0	1.52	1	0
0.65	0.71	0	0	0	0	0	0.56
0.7	0	0	0	0	0	0	0.92
2.32	0	0.72	0	0	0	0	0.28
0.7	0	0	0	0	0	0	0.39
1.5	0.5	0.12	0	0	0.41	0	0.3
0.5	1.15	0.68	0	0	0.5	0	1.4
3.15	4.56	2.65	0	0	1.89	0.5	4.95
1.01	0.04	4.95	0.35	0	4.82	0.12	3.62
0.72	3.26	5.01	1.56	0	1.54	0.1	3.71
6.02	2.31	7.32	4.41	0	0.91	0	5.68
7.99	8.45	9.01	3.78	0	0	6.56	6.42
1.25	0	0	0.25	0	0.1	0	0
0.66	0	0.6	0	0	0.1	0	0
1.68	0	0	0	0	0.6	0	0
0.51	0.56	0.59	0	0	0.72	0	0.1
0.62	0.41	0.32	0	0	1.49	1.6	0.41
0.63	0	0.44	2.49	0.25	1.15	1.25	0
0	0.1	1.9	2.9	3.01	2.24	0.85	0
1.12	0	6.31	1.66	0.91	1.5	0.31	0.61
3.61	1.23	1.98	1.27	0.59	0.32	2	1.41
0.81	3.24	0.56	1.58	1.87	1.1	4.81	2.8
3.72	1.75	1.02	1.15	4.6	2.51	3.21	3.99
0.12	0	0	0.22	0	1.5	0	0
0.13	0.25	0	4.15	0	0.31	0	0
0	0	0	3.95	0	0	0	0
0.25	0.32	0.16	0.21	0.41	0	0	0
0.1	0	0.56	0.82	0.19	0.26	0	0
0.24	0.62	0.41	0.15	0.1	0.21	0	0
0	0	0	0	1.89	0	0	0
0.1	0.15	0.8	0	0	0.39	0	0.62
1.95	1.26	1.35	0	0	0.21	0	0.71
1.56	0.57	2.49	0	0	1.76	0	1.68
0.32	0.12	1.72	4.49	1.9	2.72	2.54	1.39
0	0	0	0	0.12	0.25	0	0
0.05	0	0	0	0.48	0	1.21	0
0	0.69	0.75	0.16	0.1	0.5	0.1	0
0.8	0	0	0	0.13	0	0	0
0	1.95	0.5	0	0.89	0.12	0	0
1.66	0.59	0.71	0.3	0	0.16	0	0
0.91	1.98	2.39	0.2	0.59	2.75	2.65	2.12
1.25	3.33	0.2	0.51	0.85	0.99	1.99	1.81
1.1	2.56	0.31	0.85	0.81	1.5	2.14	2.1
1.69	1	1.51	2.39	1.22	1.61	1.15	1.51
2.21	2.8	3.24	1.5	2.59	2.25	3.1	0.69
0	0	0	0.45	0	0	0	0
0.1	0	0	0	0	0	0	0.5
0.4	1.09	0	0	0	0	0	0
0.91	0	0	0	0	1.61	0.51	0.25
0.18	0.25	0	0	0	0.78	1.4	0
0	0	0.51	0.5	0	2.33	1.71	0
0	0.77	1.98	1.41	0	1.39	1.59	0
0.238	0	1.25	2.32	1.7	2.37	2.23	0.7
0.46	0.22	0.56	1.25	2.24	3.56	2.67	0.78
3.67	0.68	1.35	2.78	5.41	2.12	1.33	2.45
4.19	4.23	3.41	4.79	4.2	0.62	0.46	1.85
0.05	0.68	0	0	0	0.72	0	0
0	0	0	0	0	0.25	0	0
0	0	0	0	0	0	0	0
0.29	0.32	0	0	0	0.12	0.31	0
1.4	0.71	0.39	0.32	0	2.08	1.12	1.12
1.36	1.63	1.69	0.45	0.22	1.09	0.98	0.71
2.23	2.16	0.21	0	0.1	1.51	1.7	2.01
2.19	3.26	0.62	0	0	2.22	1.82	2.34
2.71	2.27	3.33	0	0	3.63	1.91	1.19
0.97	4.38	4.35	0	0.5	1.18	0.92	0.32
0	4.81	4.82	2.78	1.12	3.12	0	3.41
0	0	0	0	2.35	0	0	0
0.4	0	0.1	0	0	0.15	0.19	0.25
0	0.35	0.25	1.15	0	0	0.45	0
0	0.45	0	0	0.41	0.56	0.16	0.6
0	0.56	0	0	2.42	2.21	0.25	0
0	0	0	1.22	1.05	0.82	1.28	0.71
0	0	0	0	1.01	2.61	0.8	0
0	0.31	1.9	0	0	0	1.55	0.25
1.59	1.32	3.06	0	0	0	2.75	0.82
2.01	3	2.51	0	0	0	2.11	2.61
1.75	2.81	2.79	3.95	0	0	0.45	0.35
0	0.11	0	0	1.02	0.41	0	0
0.15	0.7	0	0.01	0	0.25	0.09	0.4
0.56	0.72	0.12	0.25	0.05	0.1	0	0.25
0.81	0	0.52	0	0	1.02	0.25	0.1
0.95	0.78	0	0	0	0.99	0	0
0	1.12	0	0.1	0	1.03	0	0
0.5	0.12	0.3	0	0.12	0.81	0	0
0.9	2.32	0.72	0.23	0	0.29	0	0.22
0.8	1.35	1.9	0.2	0	1.3	0.31	0.91
2.19	2.82	3.11	0.61	0	0	1.23	0.52
4.1	2	3.95	0.51	0.62	1.11	2.15	2.05
0	0.4	0	0	0	0	0	0
0.51	0	0	0.15	0.1	0	0	0.15
0	0.15	0	0	0	0	0.1	0
0.38	0	1.72	0	0.1	0.15	0.12	0
0.59	0	0	0	0.5	0.2	0	0
0.21	1.31	0	0	0.6	1.21	0	0
0.41	0.2	0.5	0	0.32	0.31	1.19	0.45
1.5	0.42	1.24	0	0	0.25	1.35	1.12
1.74	2.38	0.49	0	0	0	0.85	1.1
1.49	1.5	1	0	1	0.91	1.05	1.3
2.31	3.35	1.81	0	0.5	1.21	1.12	1.73
0.4	0.25	0.25	0.23	0.1	0.26	0.52	0.23
0.75	1.25	1.23	1.66	1.62	0.71	0.05	1.21
0.91	0.2	0.66	0.61	0.71	0.98	0.05	0.71
0.52	2.49	0.4	0	0.8	0.25	0.12	0.39
0.45	0.69	0.71	0.1	0	0	0	0.09
0.46	0.4	0	2.21	0.71	0.84	0	0.12
0	0.15	3.12	0.16	1.15	0.95	0.12	0.35
0.41	0.5	0	0.48	0.12	0.85	0.14	0.84
0.62	0.38	0.66	0	1.35	1.4	1.31	1.24
1.68	1.71	0.52	0.7	2.23	1.71	0.8	1.22
0.78	4.94	4.41	3.12	1.69	2.24	1.99	1.83
0	0	0	0	0	0	0	0
0	0.08	0	0	0	0	0	0
0	1.24	0	0	0	0	0	0
0	0	0	0	0	0.41	0	0
0.68	0.12	0	0	0	0	0	0.12
2.67	0.68	0.71	0.12	0	0	0	0.1
1.95	2.56	0	0	0	0	0.3	0.16
2.23	2.12	0	0	0	0	0	0.94
1.61	2.13	0	0	0	2.26	0	1.68
2.32	2.25	1.56	0	0	0	0.99	1.39
1.72	1.89	1.99	0.82	2.1	0.52	1.61	2.21
0	0	0	0	0	0	0	0
0	0.51	0	0	0	0	0	0
0.1	0.81	0	0	0	0	0.42	0
0	0.59	0	0	0	0	0.56	0
0.45	2.29	0.31	0	0.41	0.29	0.58	0
0.53	1.19	1.29	0.25	0.39	2.42	1.95	0
1.25	2.39	2.33	0.1	0	0.65	2.32	0.42
1.46	1.26	1.48	0	1.04	0.3	0.39	0.53
1.29	1.88	1.84	0	0.07	0	1.63	2.16
2.19	1.89	2.49	0	0	0.16	0.85	1.06
0.99	0.72	2.39	0.11	0.35	0.48	0.65	2.01
0	2.32	0.51	0	0	0	0	0.82
1.85	2.69	0	0	0	0	1.41	0
1.16	2.39	0.25	0	0	0	0.89	0.39
0.81	2.29	0.48	0	0	0.5	0.1	0.62
0.75	1.8	2.36	0	0	0	0	1.06
1.29	0.82	0.53	0	0	0	0.46	0.39
1.35	2.85	0.21	0	0	0.09	0.19	0.92
1.06	1.15	0	0	0	0.51	0.39	2
1.6	2.15	0.41	0	0	0.2	1.59	1.43
1.95	2.79	2.69	0	0	0	1.37	2.85
0.99	2.67	0.59	0	0	0.19	1.35	2.32
0.22	0	0	0	0.2	0.39	0	0
0.7	0	0.15	0	0.29	0.35	0.21	0.29
0.7	0	0	0	0.12	0.79	1.11	0
2.02	1.2	0.65	0.15	0.24	0.38	1.39	0.51
0.15	0.7	0.05	0.1	0.35	0.1	0.71	0.24
0.3	0	1.45	0	0	0	0.89	0.92
1.1	0.77	1.12	0	0	0.37	0.62	0.71
0.91	2.37	0.51	0	0.35	0.55	1.51	1.21
1.3	1.96	0.5	0	0	1.25	0.9	1.69
2.29	1.69	1.65	0	0	0	1	1.59
1.69	0	0.79	0	0	0	0.51	0.28
0	0	0	0	0	0	0.39	0.1
0.05	0	0	0	0	0	0	0.51
0	0.44	0	0	2.26	0	0.42	0.56
0	0	0	0	0	0.1	0	0.39
0.46	1.21	0	0	0	0.64	0.3	0.69
1.12	1.58	0	0	0	0	0.09	0.5
0.99	0.85	0	0	0	0	0.1	0.55
0.76	0.37	0	0	0	0.35	0.39	0.16
0.39	0.89	0	0	0	1.11	1.66	1.19
1.19	0	0	0	0	0.21	4.71	0
0.38	0.36	0	0	0	0	3.56	1.71
2.69	2.31	0.24	0	0	0.27	2.1	2.49
1.59	0.61	0.16	0	0	0.2	3.1	2.77
1.96	1.26	0.15	0	0	0	1.19	1.65
1.89	1.25	0.27	0	0	0.1	2.33	1.17
1.6	0.97	0	0	0	0.24	2.66	2.08
3.01	1.77	0.25	0	0	0.3	3.47	1.4
1.04	1.66	0	0	0	0	1.94	1.24
1.56	1.6	0	0	0.22	0.38	2.97	1.7
1.43	2.29	0	0.2	0.25	0.12	3.31	2.24
1.52	1.39	0	0	0	0.62	1.54	1.78
1.31	1.46	0	0	0	0.1	1.62	1.22
0.51	0	0	0	0	0	0.72	0
1.54	1.36	0	0	0.28	0	0	0
3.06	0	1.25	0.22	0	2.61	1.52	0
1.2	1.55	0.4	0	0.39	0	0	0
0	1.22	1.25	0.57	0	0	0	0
0	1.08	0	1.51	0.67	1.16	0	0
0	2.29	0.15	0	0.81	0.4	0	0
0	0	0.2	0.6	1.07	0	0.3	1.31
0	2.15	0.9	0.72	3.04	2.06	0	0
0	0.82	2	0	1.18	1.1	2.5	0
4.01	1.35	2.59	0	1.79	2.12	4.48	1.15
0	0	0.39	4.2	3.59	2.51	1.51	0
0	0	0.95	3.14	3.01	2.89	2.31	0
0	0	0.89	4.1	4.59	1.8	0	0
0	0	1	2.15	3.38	2.3	0	0
0	0	0.52	1.15	3.4	1.7	0	0
0	0	0.62	2.19	1.41	3.48	0	0
0	0	0.25	3.45	2.59	6.25	0	0
0	0	6.02	3.9	0.11	3.9	0	0
0	0	4.6	1.5	3.25	4	0	0
0	1.05	8.99	4.25	6.79	3.19	1.05	1.25
0.75	2.39	6.4	0	2.88	6.5	2.12	0.79
0	0	0	0	0.22	0	0	0
0	0	0	0.85	0.34	0	0	0
0	0	0	0	0	0	0	0
0	0	0	0	0	0	0	0
0	0	0	0	0	0	0	0
0	0	0	0	0	0	0	0
0	0	0	0	0	0	0	0
0	0	0	0	0	0	0	0
0	0	1.62	0	0	0	1.2	0
0	2.51	4.77	0	0	0	0	0
0	1.88	0	0	0	0	0	0
0	0	0	0	0	0	0	0
0	0	0	0	0	0	0	0
0	0	0	0	0	0	0	0
0	0	0	0	0	0	0	0
0	0	0.45	0	0	0	0	0
0	0	0.5	0	0	0	0	0
0	0	0.79	0	0	0	0	0
0	0	0.5	0	0	0	0	0
0	0	1.06	0	0	0	0	0
0	2.15	5.19	0	0	0	0	0
0	4.24	5.94	0	3.4	2.67	0	0
0	0	2.6	2.79	0.2	0.2	0.92	0
0	0	0.6	1.74	1.85	0.25	2.82	0
0	0	0	1.93	3.96	3.22	3.47	2.17
0	0	0.5	3.35	4.74	0	1.49	0.2
0	0	2.7	2.12	0	0	0	1.01
0	0	0	1.75	1.26	0	0.89	0
0	0	5.05	4.26	0	0.6	1.04	1.22
0	0	0.7	3.52	0	0	1.05	0.54
0	0	1.79	1.5	0.64	0.8	0.72	0
0	0	2.89	3.99	0.8	1.25	12.39	0
0	0	1.25	3.49	2.14	0	5.28	0
0.25	1.01	0	0.8	3.59	3.09	3.59	3.59
3.46	0	0	0	3.06	3.21	4.01	2.94
1.85	0	0	0	5.08	2.59	2.5	3.4
3.59	0	0	0	1.78	3.68	2.45	2.44
3.12	0	0	4.67	4.49	3.7	4.86	8.02
3.21	0	0	0	3	4.8	5	3.72
0.37	0.35	0	0.27	4.1	3.57	3.51	0.54
3.19	0.8	0	0.22	3.41	3.41	3.5	0.27
3.59	1.77	0.72	0.3	1.82	2.9	1.49	0
0	2.25	3.62	2.7	3.87	3.3	1.96	4
1.19	3.57	3.3	4.79	2.1	2.11	1.95	3.2
1	0	0	0	0	0.7	1.1	3
0.71	0	0	0	0	0.99	1.09	2.82
0	0	0	0	0	0.5	1.06	1.01
0	0	0	0	0	0	0.9	1.67
0	0	0	0	0	0	0.6	2.81
0	0	0	0	0	0	0.5	4.8
0	0	0	0	0	0	0	3.09
0	0	0	0	0	0	1	2.01
0	0	0	0	0	0	1.01	3.37
3.42	0	0	0	0.67	0	2.05	1.2
3.61	2.85	0	1.95	0.79	0.77	0	0.71
0	0	0	6.1	8.21	2.95	2.75	0
0	0	0	6.8	1.6	1.31	2.39	0
0	0	0	3.88	5.21	2.19	1.19	0
0	0	0	7.1	5.5	5.11	1.59	0
0	0	0	3.15	6.89	1.6	0.87	0
0	0	0	1.5	1.31	4.2	0.7	0
0	0	0	5.36	6.11	1.81	0.45	0
0	0	0	3.3	2.16	0	0.26	0
0	0	0	1.27	1.2	4.82	0.97	0
0	0	0	1.26	1	1.57	0.88	0
0	0.3	0.4	5.99	0.3	3.19	4.1	0.98
0	0	0	0	0	4.15	2.16	0.51
5.74	0	0	0	0	1.88	1.3	0.6
4.37	0	0	0	0	0	6.98	1.79
2.35	0	0	0	0	0.5	9.75	5.49
1.71	0	0	0	0	0.3	0.2	12.1
1.06	0	0	0	0	0	1.21	7.72
0.7	0	0	0	3.21	0.7	1.7	1.12
0.25	0	0	0	2.25	0.85	1.11	0.52
0.2	0	0	0	2	2.39	1.6	1.1
0	0	0	0	2.15	2.21	1.1	1.25
0	0	0	0	1.87	3.21	0	1.3
3.24	0	0	0	4.79	3.59	1.66	3.21
5.27	0	0	0	2.66	1.52	2.39	2.21
2.88	0	0	0	4.01	3.89	2.6	2.76
3.84	0	0	0	4.98	5.7	2.62	3.1
0.91	0	0	0	4.81	5.12	1.65	7.71
1.7	0	0	0.82	1	1.45	2.82	2.54
1.1	0	0	1.3	3.38	6.59	2	1.41
6.78	0	0	0.39	3.16	2.9	2.22	2.31
4.21	0	0	0.66	2.82	3.29	1.93	4.06
1.5	1.56	0	1.23	2.2	3.1	1.4	3.36
2.99	2.08	0	2.32	3.31	4.1	0	2.55
1	1.49	0	0	1.1	0.19	1.5	2.3
3.48	0.52	0	0	1.25	0.5	0.75	2.31
1.51	0.69	0	0	1.21	1.07	2.26	2.89
0.6	0	0	0	1.27	0.6	1.82	2.57
0.62	0	0	0	0	1.55	1.72	2.46
1.45	0.7	0	0	1.71	2.62	1.59	1.01
1.35	2.07	0	2.8	2.09	5.01	3.21	1.29
0.8	0	0	0	2.61	9	6.1	1.36
0.88	0	0	0	2.39	10.41	3.78	1.1
0.6	0	0	0	6.21	9.21	6.49	0
3.22	0	0	0	5.2	9.91	2.06	0
0	0	0	4.46	1.5	3.56	2.23	0
0	0	0	7.01	4.71	3.41	3.39	0
0	0	0	0	0	3.55	3.01	0
0	0	0	0	0	0	2.56	0
0	0	0	2.23	1.71	1.59	1.922	0
0	0	0	3.99	0	4.5	3.51	0
0	0	0	4.3	2.4	2.78	0.8	0
0	0	0	7.06	5.5	3.01	2.36	0
0	0	0	3.85	4.5	4.95	1.99	0
0	0	0	4.2	1.06	3.05	0.8	0
0	0	0	3.37	1.5	1	5.21	0
0	0	2.71	2.45	2.88	3.19	1.05	0
0	0	3.5	3.6	3.4	2.98	1.49	0
0	0	2.45	4.51	3.41	2.61	0.99	0
0	0.61	2.01	2.12	8.2	3.49	1.56	0
0	0	1.97	9.89	0	3.89	0	0
0	0.5	0	3.24	0	1.98	0	0
0	0.55	2.5	6.89	3.1	1.72	0	0
0.45	3.19	2.12	6.21	1.4	2.1	0	0
1.5	0.77	1.82	1.6	2.25	4.05	1.59	0
1.02	1.32	4.05	0	1.01	1.06	3.71	0
1.57	1.03	1.4	0	4.95	1.47	3.51	0
0	0	0	0	0.71	2.5	1.6	0
0	0	0	1.05	2.95	1.39	1.36	0
0	0	0	1.32	0.95	1.38	0.75	0.75
0	0	0	0.72	2.37	1.45	1.4	0.45
0	0	0	0	3.42	2	3.13	0.56
0	0	0	1.74	3.71	2.62	6.71	0.25
0	0	0	1.85	2.88	2.4	4.45	0.66
0	0	0	2.9	2.01	2.12	2.14	0.71
0	0	0	3.73	1.46	2.82	0.9	1.2
0	0	0	2.9	4.31	2.64	1.29	0
0	0	0	1.25	2.9	1	2.25	0
0	0	0	0	0	0	0	0
0	0	0	0	0	0	0	0.14
0	0	0	0	0	0	0	0
0	0	0	0	0	0.41	0	0
0	0	0	0	0	0	0	0
0.5	0	0	0	0	0	0	0
0.39	0	0	0	0	0.51	0.51	1.06
1.2	0	0	0	0.59	0	1.01	1.04
0.97	0	0.79	0.32	0.69	0.89	0.6	0
1.35	0.05	0.52	0.29	0.5	0.66	1.05	0.5
1.56	0.1	0.91	0.52	1.9	1.89	0.99	0.87
0	0	0	0	0.07	0	0	0
0	0	0	0	0.04	0	0	0
0	0	0	0	0.06	0	0	0
0.05	0.05	0.06	0	0.15	0	0.05	0.2
0.06	0.04	0	0	0.07	0.06	0	0.05
0.15	0.05	0	0	0.14	0.04	0.42	0.05
0.25	0.05	0.06	0.05	0.45	0.15	0.14	0.15
0.19	2.21	0.05	0.1	1.03	0.25	0.5	0.15
0.21	1.55	0.89	0.5	0.77	0.2	0.6	0.3
0.91	0.86	0	0	0	0.25	0.05	0.21
2.51	0.56	0.36	0	0.51	3.21	1.4	1.21
0	0	0	0.06	0	0	0	0
0	0	1.05	0.25	0	0	0	0
0	0	0	0	0	0	0	0
0	0	0.41	1.04	0	0	0	0
0	0	0.52	0.37	0	0	0	0
0	0	0.1	0.9	0	0.2	0	0
0	0.25	0.97	0.7	0	0.5	0	0
0	0.37	1.05	0	0	0.45	0	0
0	0.45	2.52	0.19	0.03	0.25	0.16	0
0	1.99	1.24	0.21	0.36	0	0	0
0.41	0.62	0.39	0.5	0.25	0.5	0	0
0.85	0	1.12	0.75	1.25	0	0	0
0	0.23	1.15	1.1	1.65	0	0	0
0	0.75	0.8	0.52	0.95	0	0	0
0	0.94	0.2	1.45	1.25	0	0	0
0	0.05	0.21	1.5	0.51	0	0	0
0.92	0.15	0.95	0.61	0.71	0.5	0	0
0.51	1.31	1.21	1.07	2.4	0	0	0
3.52	6.12	5.46	1.51	5.76	1.35	0	0
3.91	2.72	4.75	1.52	1.89	2.51	0	0
5.12	0.24	0.7	0.85	3.25	2.49	0	0
2.61	0.77	0	1.24	7.99	1.6	0	0
0	0	0	0.35	0.05	0	0	0
0	0	0.05	0.06	0.21	0	0	0
0	0	0	0.06	0.15	0	0	0
0	0	0	0.05	0.04	0	0	0
0	0	0.4	0.4	0.2	0	0	0
0	0	0	0.99	0	0	0	0
0	0.12	0.05	2.21	0.21	0	0	0
0	0	2.25	0	0.3	0.72	0	0
0	0.62	3.9	0.5	0.25	0	0	0
0	0	1.05	5.25	0	0.55	0.45	0
0	0.85	0.5	2.05	5.89	1.26	1.2	0
0	0	0.42	0	0.55	0	0	0
0	0	0.2	0.02	0.22	0	0	0
0	0	0.1	0.36	0.09	0	0	0
0	0.12	0	0.2	0	0	0	0
0	0.41	0.15	0.59	0	0	0	0
0	0.39	0.45	0.32	0.1	0.69	0	0
0	0.7	1.8	0.71	0.04	0	0	0
0	0.55	3.21	1.12	0	0	0	0
0	1.75	3.2	0.67	0	2.78	0	0
0	4.22	2.02	0.2	1.65	2.1	0	0
1.4	2.95	1.7	1.39	1.67	0	0.51	1.7
0.7	0.6	2	0.79	2.09	1.01	0.65	0
0.44	0.31	0.56	0.52	1.19	0.81	0.54	0.14
0.51	2.01	0.2	0.59	2.24	0.32	0.7	0.59
0.52	1.41	1.05	0.7	1.35	1.35	0.09	0.52
0.55	1.51	1.4	1.12	2.02	1.51	0.25	0.75
1.01	0.8	0.98	1.5	2.54	0.44	0.54	1.12
0.2	4.01	1.44	0.69	0.8	0.79	1.52	0.69
0.8	6.66	3.2	1.49	1.34	1.21	1.59	1
0.5	3.21	2.01	1.24	1.75	0.71	0.79	1.1
0.71	9.12	2.14	0.2	0.81	1.01	0.49	1.09
0.21	4.61	1.55	0	0.89	0.61	0.44	0.31
0	0	0.21	0	0	0	0	0
0	0	0	0	0	0	0	0
0	0	0	0	0	0	0	0.32
0	0	0	0	0	0	0	0
0	0	0.15	0	0	0	0	0.25
0	0	1.9	0	0	0	0	0
0	0	0	0.85	0	0	0	0
0.8	1.15	0.69	1.12	0.5	0	0.6	0
0.1	1.39	1.19	2.1	1.5	0	1.66	1.02
2.56	2.15	2.35	1.95	2.32	0.36	1.9	1.01
1.7	0.9	5.7	1.22	2.62	1.75	2.9	2
0	0.25	0.39	0.25	0	0.51	0.55	0
0	0	0.24	0	1.11	0.39	0.5	0
0	0.06	0.15	0	0.4	1.06	0.8	0
0	0	0	0.15	0.62	0.56	0.5	0
0	0	0	0	0	0.65	1.8	0
0	0	0	0	0	0	0	0
0	0	0.19	0	0	0	0.85	0
0.5	0	0	0	0.71	0	0	0
0.6	1.06	1.59	0.25	0	0.9	1.19	0.4
1.01	0.62	3.6	1.02	1.5	0.75	0.25	0.22
0	1.12	1.06	1	0.05	0.2	1.71	0.52
0	0	1.01	0.24	0.51	2.21	0.71	0.69
0	0	0.09	0.46	0.9	1.01	0.91	0
0	1	0.51	0	0.35	1	0.28	0
0	0	0	0	0	0	0.39	0
0.89	0.5	0.62	0.92	0.46	0	0	0.52
0.41	0.1	0.25	0.06	0	0	0.67	1.49
0.51	1.02	0.2	0.21	0.92	0	1.07	1.01
1	1.61	0.61	0.26	0.61	0.49	1.01	2
0.82	0.52	1.14	0	1.09	1.75	2.49	2.89
0.8	1.4	1.32	0.19	0.71	0.31	2.32	1.05
0.69	0.6	0.39	0.49	0.4	0.7	1.59	1.01
0	0.59	0	0.1	0	0.92	0.75	0.4
0.42	0	0.1	1.6	0	0	1.35	0.45
0.38	0.26	0.51	0	0.52	0	0.63	1.47
0.27	1.02	0.27	0.22	0.69	0.49	0.37	1.36
0.82	1.89	0.11	0.71	0.36	2.68	1.03	0.87
0.52	1.05	1.45	0.82	0.54	0.59	2.71	0.41
0.29	0.35	0	1.2	2.77	1.3	2.09	2.14
1.21	0.99	0.72	0.3	0.25	1.5	1.15	2
0.81	0.61	0.66	2.27	0.38	0.42	2.4	3.33
1.75	1.4	0.22	0.89	0.9	1.81	3.99	2.3
0.19	1.71	2.53	2.77	2.7	4.41	4.26	2.5
0.82	0.25	0.34	1.13	0	0.1	4.2	1.41
0.72	0.67	0.15	0.1	0	0.23	3.49	0.52
1.21	2.37	0.99	0	0	0.19	1.65	0.89
1.44	1.46	1.39	0.21	1.31	0.42	2.71	1.42
1.65	2.05	0.82	0.92	1.66	0.1	1.42	2.43
2.37	0.94	0.87	0	0	0	4.24	4.01
4.42	5	4.45	0.6	0	3.12	3.13	2.51
3.22	1.81	3.98	0.41	0.37	2	1.1	0.32
2.12	4.01	4.97	0.2	0.2	0.65	2.78	2.19
5.1	2.99	2.23	1.34	1.5	1.2	3.21	5.61
2.13	2.34	5.24	0.51	2.14	2.05	3.31	6.12
1.71	2.69	0.65	3.05	0	0	0	4.09
0.19	3.52	1.59	0.3	0	0	0	0.98
2.32	2.19	1.71	1.72	4.2	0	0.52	1.59
2.25	0.1	0	1.35	0.2	0.99	0.2	0.1
0.34	3.21	1.69	2.41	1.99	1.5	0	0
0	1.52	0.72	2.85	1.77	0.1	1.29	0.2
0.41	0.23	0.31	1.5	0	0.62	0.5	0.24
0.71	0.21	0	0.25	0.4	0	0.88	1.19
2.32	0.76	0.99	3.31	0.31	0.72	0.98	0.78
1.62	1.41	1.06	0.71	0.33	1.91	1.2	0.28
0.25	2.52	0.82	1.12	0	1.71	1.25	0
0.78	0	0	0	0	0	2.55	2.32
5.19	5.14	2.91	0	0.31	0.76	1.47	1.25
1.92	4.7	5.31	0	0.78	4.21	0	1.24
2.47	4.16	2.31	1.12	0	4.65	4.49	2.35
3.95	4.19	4.22	7.07	7.12	0	0.66	5.1
0	0	2.14	0.62	0	0	0.59	0.78
0.69	1.11	0.32	3.31	0	0	0.6	0.61
1.14	0.35	2.69	1.21	0.52	7.35	1.98	3.42
2.35	3.21	4.31	5.62	2.66	0	2.36	2.56
0.12	0.61	5.02	8.32	1.72	6.36	5.31	1.72
0	0	0.82	1.41	2.61	5.71	2.28	1.68
0.1	1.49	0.2	0	0	0	0	0.11
2.41	0.61	0	0	0	1.01	0.18	1.75
0.5	0.77	0	0	0	0	0	0.19
0	1.2	0	0	0	0	1.85	1.78
0.19	0.1	1.25	0.8	0.66	1.71	0.85	0.6
4.69	1.04	0	0	0	3.72	5.32	4.77
2.38	7.24	5.32	3.41	1.68	1.36	2.58	1.65
1.2	7.36	4.87	3.26	5.77	1.62	1.89	1.61
2.01	5.23	2.45	3.31	0.36	0.91	2.26	1.32
0.67	1.4	6.23	0.31	0.31	0.26	1.51	0.28
0	0	0.4	0.69	0.26	0.3	0.54	1.01
3.79	0.1	2.66	1.19	0	0	2.21	6.71
0.39	0	0	0	0.1	0	0.89	0.25
1.01	0.6	0.78	0	0	0	0	0.87
0	0.72	0.92	0.7	0	0	1.36	3.72
0.45	0.66	0.69	0	0	0	1.34	3.16
0.62	1.2	0.35	0	0.15	0	0.69	1.21
2.1	1.5	0.5	0	0	0	0.29	0.56
2.51	2.78	0.39	1.61	0	0.15	6.34	0.69
0.52	0.49	0.34	0.48	0	0.24	0.96	0.95
0.36	0.25	1.91	4.62	0.21	1.62	2.99	0
0	0	1.72	4.71	0.56	0.51	3.26	0
0	0.19	0.2	0	1.56	1.67	1.02	0
4.62	1.47	0.09	1.34	1.24	9.12	8.25	5.49
0.25	2.7	0.14	0	0	1.01	0.15	0.37
0.1	0.14	0	0	0.25	0	0	0
0.11	0.62	0.39	0	0	0	1.12	0.11
3.35	3.47	2.87	1.32	0	2.67	4.89	3.31
2.12	2.15	1.56	0.5	0.24	5.24	4.56	0.12
1.21	0.54	0.39	2.54	0.62	3.12	4.52	4.21
3.72	0.15	0.99	0.35	0.34	0.24	0	2.31
8.98	0.24	0.32	7.14	0	0	0	4.42
3.31	2.21	1.87	0	0.91	4.31	0	3.98
0	1.1	0.5	0	0	0.39	2.12	0
0.35	1.24	0.67	0	0	0.29	0.25	0.1
1.26	1.29	0.19	0.49	0.42	0.1	2.48	0.72
0.67	2.69	0.62	3.38	4.88	5.48	4.44	4.31
0.79	0	1.4	3.12	2.87	1.05	0.79	0.82
0.24	2.88	2.5	1.65	8.99	8.01	0	0
0.69	0.71	0.32	3.21	1.89	0.39	0.32	0.79
0.68	2.32	0	0.41	3.64	1.72	1.12	4.15
1.67	3.24	0	1.3	6.12	1.43	2.19	0.24
0.81	1.56	0	0	5.34	4	0.5	1.46
0.69	0	0	1.19	0	2.53	1.08	1.24
0	0	0	0	0	0.26	0	0
0	0	0	0	0	0.1	0.03	0
0	0	0	0	0.08	0.06	0	0
0.15	0	0	0	0.62	0.09	0	0
0	0	0	0	0	0	0	0
0	0	0	0	0.31	0	0.03	0
0	0	0	0	0.72	2.82	0	0
0	1.71	3.06	0	2.23	0	0.42	0
0	0.39	0.15	0.11	2.08	0	1.38	0
0.73	1.06	0.2	2.32	1.13	0.84	3.45	2.31
1.19	0.68	0.55	0.81	1	1.49	1.98	5.32
3.59	1.61	0	0	0.15	3.11	2.57	3.33
3.8	1.36	0	0	4.19	4.34	0	3.35
0.49	3.35	0	0	2.23	2.99	2.91	0
4.99	2.66	0	0	0	5.12	2.55	2.61
4.34	0.35	0	0	3.32	5.47	4.62	3.1
1.89	0.49	0	0	0	1.49	1.24	0.8
4.75	0	0	0	3.71	2.76	2.77	3.1
4.88	0	0	0	1.72	3.88	3.81	4.56
2.55	0	0	0	5.24	6.19	6.92	3.24
3.11	0.39	0.48	0.15	2.23	2.21	6.66	1.7
0.78	1.92	4.77	6.15	0.8	1.19	0.61	3.99
0.71	0	0	0	0.31	0	2.25	1.6
0	2.99	0	0	2.82	4.42	4.56	3.12
7.51	0	0	0	0	2.59	4.2	3.75
0.1	0	0	0	0	4.66	4.06	1.68
0.5	0	0	0	0	1.91	3.39	3.36
0	0	0	0	0	4.09	2.55	2.95
0	0	0	0	0	4.39	3.21	4.12
2.06	0	0	0	0.2	7.34	4.12	5.31
1.89	0	1.49	0	0.15	7.71	11.21	5.36
0	2.21	0.49	4.51	3.52	8.49	6.62	8.43
0	1.8	0.59	3.68	4.32	8.9	6.47	2.89
2.56	1.72	4.08	3.41	2.09	2.91	2.62	3.59
3.59	3.88	0.69	4.4	0	4.11	1.45	2.47
3.5	3.21	1.55	0.9	4.71	5.39	2.21	1.18
2.75	4.02	3.77	4.65	4.71	2.3	1.25	2.19
1.88	3.7	2.9	2.61	5.52	2.99	2.41	2.51
3.21	2.88	0.23	0	1.09	0.35	4.35	3.14
2.15	0.3	3.15	4	0	3.78	2.49	2.49
3.31	0.2	0.82	1.39	2.89	3.19	4.25	3.12
0.65	3.31	0.1	2.05	2.7	3.9	3.3	3.35
5.8	4.2	3.2	2.67	3.7	2.15	2.7	4.59
8.91	9.83	7.26	3.57	3.66	1.56	6.77	2.62
3.69	3	0	0.59	2.54	2.27	3.09	2.97
0.81	2.21	0	0	0.62	3.39	2.88	2.29
4.49	0	0	0	0	2.29	2.92	3.19
0.31	3.52	0	0	0.3	4.8	2.81	2.61
2.49	2.89	0	0	0	1.7	1.01	2.52
2.51	0.71	0	0	0	4.7	0.52	1.71
2.65	0.79	0.62	0	0.19	3.12	0.49	4.07
2.18	1.21	2.24	0	0	3.69	1.59	3.1
1.69	1.42	0.2	0.29	1.7	3.69	0.87	3.2
3.19	0.19	0.39	1.59	1.69	1.29	2.59	1.59
1.47	0.24	0.99	2.41	2.87	2.57	0.69	4.19
3.49	4.16	4.42	0	0	0.56	4.17	3.49
4.71	4.2	5.24	0.7	0.1	0.15	1.89	4.89
3.49	3.19	0.2	0.15	0.41	1.09	3.56	0.67
3.7	2.19	2.1	3.3	0	0.25	0.29	0.71
0	0.3	1.17	0.18	0.1	0	0.5	3.9
3.09	3.15	0.6	1.29	0.5	0	0.62	0.39
3.6	4.54	4.05	5.27	3.57	1.24	0.6	0.1
4.57	5.12	2.56	0	0	1.22	4.71	0.51
3.78	3.23	3.71	0.89	4.12	0.2	0.6	0.68
5.06	0.3	1.1	2.23	2.12	2.78	4.92	1.62
3.99	1.89	1.74	2.49	3.51	3.21	4.48	5.56
0.47	2.16	0.6	0	0.2	0.51	1.05	2.41
2.54	2.51	0.45	4.71	2.45	4.2	5.2	4.85
0.1	4.49	4.5	2.05	3.1	0.79	1.2	4.89
0.56	0.39	0.9	1.45	0.25	0.61	2.59	4.36
2.21	1.5	0.21	0.49	0.41	1.39	5.51	1.8
3.01	1.5	0.2	0.97	2	2.8	2.69	4.68
3.5	1.12	1.06	0.31	5.2	0.79	3.22	1.11
3.89	2.61	3.17	0.92	0.49	3.09	3.35	1.57
3.5	2.79	3.32	0.2	1.49	2.42	4.05	4.76
3.2	0.72	1.35	0.49	1.9	7.53	5.1	5
1.22	6.21	2.91	2.29	1.01	0.27	4.72	2.69
0	0	0.39	0	2.1	3.56	1.5	1.55
2.45	0	0	0	4.59	2.69	0.9	1.47
4.23	2.56	0	0	3.88	3.85	0.39	0.3
4.27	3.39	0	0	0	3.5	0.56	0.57
0	0.5	0	2.19	0	0	0.1	0.62
0.21	0	0	3.61	0.37	0	3.59	0.78
0	0.31	1.69	3.09	3.92	2.5	3.91	2.32
0.99	0	0.05	4.79	3.71	1.19	0	1.61
0	4.99	0	2.91	6.21	2.14	0.2	5.12
4.97	0	0	0	4.31	8.21	1.21	3.32
0	0	0	0	3.69	8.01	1.7	2.1
0.25	0.05	0	0	0	0	0	0
0.26	0.49	0.01	0.89	0	0.27	0	0
0	0.71	0.69	0	0	0	0	0
0	0	0	0	0.63	0	0	1.21
1.42	0	0	0	0.12	0.11	1.79	1.32
0	0	0	0.12	1.68	1.68	0.66	0
0.78	2.01	0	0	0.16	0.21	0.71	0.31
0.45	0	1.34	0	0.61	0.82	1.22	0.78
4.56	4.12	0	0	0.1	0.72	1.78	1.72
2.32	5.21	1.23	0	0.22	2.78	2.64	0
2.41	6.76	0	0	1.32	0.76	0.82	0
0.12	0	0	0	0.19	0.32	1.21	0.89
0	0	3.15	1.61	0.31	0	0.54	0.91
0	0	0.4	0	0	0	0.1	0
0	2.75	1.81	1.9	0.61	1.51	0.78	0.39
0	0	0.22	0.21	0	0.21	1.45	0.61
0.82	0	0	0.12	0	0.14	0.71	0.79
0.61	0.68	0.31	0	0	0.78	1.31	0.35
1.22	0.32	0.21	0	0.32	0.42	0.41	0.71
1.12	0	0	0	0.61	1.67	0.98	0.39
1.41	0.71	2.74	0.41	4.71	4.11	1.11	0.42
1.24	2.51	1.22	2.41	3.41	1.99	1.71	0.19
1	0.19	0	0	0	0	1.22	1.23
0.61	1.78	1.25	0	0	0.05	1.31	2.55
5.01	3.15	0	0	0	0	0.36	0.98
2.15	1.65	0.01	0	0	0.11	3.11	1.22
2.89	0.77	0	0	0	0	1.89	1.53
3.01	0.45	0.61	0	0.42	0.15	2.05	1.41
0.21	0	0.05	0.05	0.06	0.13	5.41	0.39
4.01	0.66	0.04	0.04	1.39	1.79	0.82	1.24
1.99	3.67	1.62	0.63	2.12	0	0.73	4.93
3.23	4.66	2.32	1.21	0.61	1.31	1.61	0.52
3.15	2.71	3.56	0.69	3.89	0.722	0	1.42
0.62	1.41	0	0.15	0.07	0	0	0
0.41	0.41	5.12	1.12	0.62	1.98	0.01	0
0.62	0.29	0.71	1.24	0	1.24	0.04	2.01
0.31	0.61	0	0	0.32	4.34	2.42	0.42
0.71	1.23	0	0	0.69	2.15	2.32	0.93
1.12	0.05	0.19	0.13	2.14	1.67	1.66	1.62
0.35	0.61	0.67	2.35	0.72	0.89	0.62	1.12
0.91	3.39	2.42	2.47	3.45	3.45	0.89	2.99
0.79	2.72	2.34	2.82	1.42	2.24	2.12	0.22
0.51	0.41	4.72	1.01	2.24	2.65	1.12	1.05
1.51	0.66	0.61	1.34	1.56	1.75	2.31	4.22
1.01	3.67	3.67	0.05	0.42	0.15	0.42	0
0.98	0.72	0	0.11	0.39	0.06	0.19	0.51
0.79	0	0	0	0	0.01	0.11	1.22
1.32	0	0	0.19	0	0	0.05	0.81
3.15	0	0	0	0.39	1.21	1.01	0.52
0	0.21	0	1.06	0	3.24	2.42	0.62
3.23	0.23	0.23	0	0	2.61	0.82	2.21
2.14	0.39	0	0	0	4.22	0.61	0.61
3.99	2.98	0.31	0.05	0.32	2.89	0.62	1.34
0.21	2.32	0	0	1.48	2.84	2.21	0.42
0	3.65	3.62	4.32	3.65	1.21	0	0
0	0	0	0	0	0	1.99	0
0.32	0.06	0	0.05	0	0	0	1.11
0	0	0	0	0	0	0	0.89
0	0.56	0.18	0	0	0	0	0.05
0.42	1.67	4.21	1.55	0.81	0	0	0
0	0	0	0	0	0	0.34	0.05
0.79	1.55	0.67	0	3.27	0.3	0.21	0
1.21	1.65	0.38	2.15	0.29	0	0.39	1.23
0.88	0.72	4.23	2.78	0.66	0.44	0.42	0.99
1.31	1.49	1.45	0.99	1.34	1.2	1.51	1.29
0	0.68	4.44	1.15	5.78	1.8	2.42	1.3
0.45	0	0	0	0	0.05	0	0.45
0.21	0	0	0	0	0.02	0.42	0.37
0	0.25	0	0	0	0	1.01	0.89
0	0	0	0	0	0	0.54	0.25
0.39	0.02	0	0	0	0	0	1.31
1.48	0	0	0	0.1	0	2.12	0.41
0.42	0.88	0	0	0	0	1.11	0.26
1.41	0.65	0.79	0	0	0	1.45	0.15
0.22	2.67	2.75	2.01	0	0	0.85	0.61
0.88	1.67	1.65	1.15	0	0	3.01	0.89
1.01	2.41	2.01	2.13	0	0.67	2.61	1.88
0	0	0	0	0	0	0	0
0.54	1.21	0	0	0	0	0	0.2
0.41	1.31	1.2	0	0	0	0	0.35
0	0	0	0.45	0	0	0	0
0	0	0	0	0	0	0	0
0	0.78	3.87	3.72	2.57	0.81	0	0
5.91	6.12	4.12	7.89	6.45	3.36	0	1.4
5.12	0	1.61	6.67	8.91	10.32	5.23	1.8
0	0.8	1.12	3.21	4.61	7.11	13.31	0
6.61	3.21	4.91	6.1	0	5.1	0	2.1
0	0	0	0	0	0	0	6.2
0	0	0	0	0	0	0	0
1.56	1.54	0	0	0	0	0	0.67
0	0	0	0.32	0	0	0	0
1.54	2.15	1.56	3.55	0	2.78	3.56	3.15
0	0	0.1	2.41	0	0.43	1.21	1.21
0	0	0.32	0	0.32	1.12	0.21	0.2
0	0.81	0	0	2.43	0.91	0.51	0.61
4.12	1.12	0	0	6.54	6.12	4.35	5.21
1.45	2.15	1.21	1	0	0.42	0	0
4.27	3.46	12.78	15.12	11.12	0.78	1.35	1.41
9.13	7.98	3.25	6.12	8.12	0.76	4.13	3.25
0.42	0.25	0.32	0	0	0	0	0
0	0	0	0.74	0	0	0	0
0.78	0.1	0.21	0.31	1.21	1.57	0	0
0.84	0.67	0	0	4.78	2.67	0	0.61
0	0.24	0	0.12	0.67	1.35	2.21	0.62
0.24	0.21	0.01	0	0.25	0.78	2.25	1.78
0	0	0	0.24	0	0.45	0	0
0.47	0.1	0.89	3.21	3.31	5.61	3.89	2.21
0.12	0.31	0	3.25	3.89	4.91	7.21	5.24
0.05	0	0.21	0.01	0	0	6.89	2.78
0.67	1.21	0.24	0.1	0	0	2.87	0
0	0	0	0	0	0	0	0
1.5	2.12	0.61	0.31	1.12	2.78	2.54	0.85
0	3.31	0	0.12	0	6.52	4.21	0
0	1.41	0	0	4.32	1.55	4.32	1.52
1.22	3.81	0	0.31	0	5.36	3.65	0
0	0	0.15	0.25	0	0	0	0
0	0	0	0	0	0.2	0.15	0.99
0	0.3	0.47	0.15	0.78	0	3.12	0
2.12	1.89	4.21	4.67	6.42	4.12	0.45	1.7
2.32	2.11	2.12	1.08	4.87	1.41	3.56	2.9
0.22	6.05	0	0	5.12	5.22	0.85	0.19
2.25	0.5	0.51	0	0	0.8	0.5	0
2.53	3.15	1.45	0	0	4.26	3.75	4.71
5.67	5.98	4.15	0	4.24	0	3.71	4.81
0	0	0	1.55	0	1.85	0	0
5.55	3.15	0.45	0	0	0.2	0.75	0.79
4.95	0.95	1.25	0.51	1.45	0	5.95	3.15
6.01	3.51	0.65	0.25	0.41	0.82	3.35	3.4
5.65	0.91	4.98	3.21	4.72	0.67	0	7.31
0.2	0.21	0.32	0.85	3.21	0.3	0	6.76
0	0.1	0.41	0.52	0	0.85	0	0
9.65	0	1.32	0.45	0.2	1.21	0	1.5
0	0	0	0	0	0	0	0
0	0	0	0	0	0	0	0
0.39	1.45	2.54	0	2.56	0.65	2.25	0.2
0	0.98	0	0.4	1.56	0	0	0
0	0.66	0.32	1.25	1.49	0.89	0.01	0
0.49	0.89	0.61	0.99	2.99	2.21	0.2	1.1
0.01	0.5	0.3	0.89	0.51	0.43	0.32	0
0.49	0	0.7	0.61	4.66	1.91	1.66	0.8
0.41	1.15	0.25	0.95	4.51	1.07	1.21	1.66
1.21	1.78	1.5	1.85	2.89	2.5	0.89	1.81
1.01	0.71	1.67	0	5.39	2.15	0	1.2
0	0	0	0	0	0	0	0
0	0.01	0	0	0	0	0	0
0	0	0	0	0	0	0.01	0
0	0	0	0	0	0	0	0
0	0	0	0	0	0	0	0
0	0	0	0	0	0	0	0
0.23	0	0	0	0	0	0	0.01
0.65	0	0	0	0	0	0	0.34
1.05	0.36	0	0	0	0	1.1	1.15
0.74	0	0	0	0	0	1.14	0.81
0.38	0	0	0	0	0	0.75	0.46
1.31	0.72	0.2	0	0.21	0.52	0.72	0.21
0.79	0.24	0.51	0	0.15	0.02	0.39	0.51
0	0.1	0.12	0	0.63	0.1	0	0
0	0.45	0.05	0.16	0.04	0.05	0.77	0.91
0	0	0	0	0	0	0.89	0.21
0	0	0.92	0.35	0	0.1	0.05	0.12
0.88	2.14	1.4	0.41	0.09	0	0	1.06
0.94	2.34	2.21	0	0	0	0.05	1.11
0	2.67	2.39	0	0	0.12	0	3.2
1.24	0.91	2.64	0	0	0	0	1.71
0	0.54	0	0.31	0	0	0	1.31
1.99	1.32	0.8	0	2.15	0.51	1.12	1.77
2	0	0	0	0	0.87	0	0
0.77	0.99	0.54	0	0	0	1.14	0.84
1.42	0.54	0.41	0	0	0.51	0.12	0.55
0.39	0.2	0.22	0	0	0	0.66	0
1.55	2.45	1.57	0.41	0	1.52	0.71	0.43
0.92	3.24	0	0	0	0	0	1.08
0.61	0	0	0	0	1.24	0.89	2.99
2.12	2.41	0	0	0	2.32	2.49	3.12
2.37	3.2	0	0	0	1.32	3.01	2.87
0.61	2	0	0	0	2.44	1.01	2.12
0.87	0	0	0	0.68	0.62	0.39	1.21
1.49	0.66	0	0	0.22	0.42	0.5	1.23
0.78	0.24	0.11	0	0	0	0	1.02
0.31	0	0	0	0	0	0	0.24
0.87	0	0	0	0	1.33	0.22	0.4
0.5	0	0	0	0	0.51	0.43	0.9
0.47	0	0	0	0	0.02	0.29	0.41
0	0	0	0	0	0.29	0.62	0.42
0.41	0	0	0	0	0.5	0.71	0.84
0.42	0.25	0.32	1.32	0	0.19	1.62	1.06
0.62	0.41	0	0	0	1.13	0.49	0.69
1.98	1.21	0.55	1.77	1.86	2.75	2.93	1.5
1.54	0	0.56	3.16	1.34	3.56	2.75	2.01
2.71	0	0.85	1.15	3.07	2.3	2.8	2.52
2.15	0.75	0	2.02	3.11	3.45	3.36	2.39
2.06	1.23	0	1.34	2.59	2.26	3.61	2.75
2.32	0	0	0	2.2	2.25	2.99	3.61
2.23	0	0	0	4.73	2.75	3.17	2.61
4.73	0	0	0	3.06	4.1	2.54	2.62
3.25	0	0	0.65	3.19	3.6	3.45	2.59
2.74	0	0	3.77	3.28	3.09	3.56	2.6
2.08	0	0	2.56	3.25	2.41	2.67	2.5
0	0	0	0.25	0	0	0	0
0	0	0	0	0.24	0	0	0
0	0	0	0	0	0.1	0.14	0
0	0	0	0	0	0.11	0.67	0
0	0	0	0	0.05	0.05	0.55	0
0	0	0.38	0.15	0.21	0.15	0.84	0
1.08	0.6	0.04	0.21	0.05	0.16	0.71	0
0	0.44	0.11	0.22	0.06	0.2	0.37	0.32
0.09	0.45	0.7	1.05	0.5	2.15	0.74	0.45
2.45	0.47	0.52	0.01	1.49	1.85	0.69	0.5
4	1.21	1.1	1.02	0.19	1.02	0.7	0.2
0	0	0	0	0	0	0.97	0
0	0	0	0	0	0	0.25	0
0	0	0	0	0	0	4.79	0
0	0	0	2.1	0	0	0.15	0
0	0	0	2.69	0	1.15	0	0
0	1.2	1.02	1.39	0.21	0	0	0
0	0.77	0	4.53	0.1	0	0	0
0	0.51	0	5.39	1.78	0	0	0
0	0	0.25	6.9	6.39	0	0	0
0.81	2.46	5.49	6.59	7.19	1.16	0	2.7
3.2	9.39	12.78	12.48	3.97	1.01	3.39	3.41
0	0	0	0	0	0	0	0
0	0	0	0	0.39	0	0	0
0	0	0	0	0.25	1.04	0	0
0	0	0	0	0.25	0	3.15	0
0	0	0	0	1.19	0	0	0
0	0.9	0	4.99	1.01	0.65	0	0
0	0	7.35	10.88	11.1	5.39	0	0
0	0	9.1	9.36	3.33	9.25	0	0
4	7.78	8.81	5.41	9.21	7.41	0.67	0
12.17	6.99	1.4	9.58	6.21	11.86	6.91	0
13.56	13.89	0.19	7.79	1.56	1.89	0.19	0
0	0	0	0	0	0	0	0
0	0	0	0.24	0.25	0	0	0
0	0.5	0	1.02	1	0	0	0
0	0	2.04	0	1.61	0	0	4.2
0	0.69	0.51	0	0.5	0.45	0.22	0
0	0.11	0.05	0	0.3	0.05	0.43	0
0	0.1	0	0	1.1	0	0	0
0.9	0.25	0	0	2	0	0.35	2.06
0.95	0.05	0.78	0	0.7	0.65	0.58	1.2
3.37	0	0.3	2.65	0.68	0.7	0.7	5.14
8.46	0	0	0.2	9.99	2.55	2.37	9.48
0	0	0	0	0	0	0	0
0	0	2.35	0	0	0	0	0
0	1.58	0.5	0	0	0	0	0
0	1.7	0	2.12	0	0	0	0
0	4.41	7.19	4.99	0	0	0	0
0	0	0	3.78	0	0	0	0
0	3.85	6.89	5.25	0	0	0	0
0	11.25	9.99	0	0	0	0	0
0	0	13.67	4.55	0	0	0	0
1.15	0	6.28	0	0	0	0	0
2.58	13.5	7.21	0	0	0	0	0
0	0	0	0	0	0	0	0
0	0	0	0	0	0	0	0
0	2	0	0.5	0	0	0	0
0	1.12	0	0.25	0	0	0	0
0	4.3	4.32	5.5	0	0	0	0
0	2.4	3.67	7.61	1.8	0	0	0
0.75	5.25	0	9.65	4.01	0	0	0
0	4.78	14.99	5.1	4.21	4.9	6.78	0
1.01	0	11.8	9.55	10.21	1.4	2.31	0
3.24	13	11.01	1.12	6.49	8.01	3.81	2.01
13.21	10.01	8.89	0.2	8.1	7.21	11.5	9.12
0	0	1.6	2.51	0	0	0	0
0	0	0	2.71	0	0	0	0
0	0	0	0	0	0	0.59	0
0	0	0	1	0	0	0	0
0	0	0.2	0.54	0	0	0	0
0	0	1.99	0.7	0.5	0.75	1.45	0
0	0	5.01	5.5	0.5	0.25	1.5	0
0	0	8.72	6.77	4.25	0.5	0.45	0
0	0.3	4	11.3	2.78	3.89	1.7	0
0	12.99	1.01	6.12	3.39	11.45	13.21	2.31
3.49	10.98	10.9	1.7	1.05	8.15	13.5	4.5
0	0	0	0	0	0	0	0
1.12	0	0	0	0	0	0	0
0.51	0	0	0	0	0	0	0
2.51	1.84	0	0	0	0	0	0
0	0.14	0	0	0	0	0	0
0	2.44	1.21	0	0	0	0	0
0.7	0	2.12	0	0	0	0	0
0.3	2.74	2.65	4.08	1.12	0	0	0
0.25	0	5.54	5.01	0.65	0.75	0.39	0
0.19	4.5	8.3	2.31	1.87	0.64	0.49	0
7.89	4.75	9.25	8.32	5.48	1.89	0.5	1.61
0	0	0	0	3.56	0	0.51	0
0	0	0	0	0.37	0	0	0
0	0	0	0	2.51	0	0.22	0
0	0	0	0	1.94	0	0	0
0	0	0	0	0	0.8	0	0
0	0	0	0	0.5	0	1.99	3.72
0	0	0	0	1.71	3.9	1.43	7.71
0	1.5	0	1.92	0	6.81	4.45	5.51
0	0	0	0	0	2.32	4.54	3.61
0	0	0	3.35	0	1.21	4.78	2.13
0	0	0	4.21	0	1.53	7.45	5.12
0	1.3	3.56	2.25	0	0	0	0
0	6.36	5.25	3.06	0.45	0	0	0
0	8.4	8.2	5.7	0	0.81	0	0
0	0.25	5.1	9.39	0	3.48	0	0
0	1.99	1.13	7.19	0	2.75	0	0
0	3.52	3.92	3.01	4.92	2.6	0	0
0	5.95	4.9	2.6	7.92	1.24	0	0
0	7.4	8.12	6.01	2.51	4.2	0	0
0	4.45	6	7.12	2.29	6.15	0	0
0	7.79	4.35	6.9	2.2	9.99	4.5	5.61
0	4.05	3.4	4.59	4.95	14.6	0	3.09
0	0.19	1.3	2.19	0	0	0	1.49
2.24	0.24	0.19	0	0	0	0	2.15
0	0.29	0	1.09	0	0	0.93	0
0	0	0	0	0	0	0	0
5.23	0.2	0	0	0.39	0	0.51	1.24
1.54	0.25	0.25	0	0	0	0	0.39
1.23	2.57	2.6	0	0.3	1.15	0.92	2.47
3.9	1.14	0.03	2.65	0.92	2.24	1.19	3.12
2.95	4.95	1.4	3.25	0.43	3.23	2.6	4.05
4.21	1.75	0.39	1.29	0.25	5.39	1.49	5
2.5	3.39	1.89	1.4	0.64	2.71	1.24	1.59
2.95	1.27	1.95	0	0	0	0.61	1.01
0	1.79	0.9	0	0.45	0	0	0
0.75	0.46	0	0	0	0	0	0.46
2.99	2.52	0	0	0	0	2.12	3.23
3.85	0	0	0	0.49	0	0.85	2.5
3.47	2.67	0	0	0	0	0.25	5.05
2.67	1.65	0	0	0	0	1.99	1.1
5.15	7.81	0	0	0	0	4.31	3.52
4.62	5.01	0.25	0	0	1.52	2.35	4.01
1.5	4.72	0.2	0	1.21	1	3.39	3.19
6.4	2.7	2.3	1.59	5.23	2.39	1.25	1.41
2.77	0.3	0	0	0	0	1.45	1.1
3.71	2.5	0	0	0	0.52	1.2	3.4
0.9	0.44	0	0	0	0	0	2.79
2.15	0.4	0	0	1.99	0	1.81	2.65
2.45	0	0.49	0.2	1.9	0.51	3.3	3.1
0	0	0	0	0.65	1.1	0.52	0.59
4.2	1.35	0	0	0.58	0	0.89	1.35
1.3	0.15	0	0	0	2.4	1.6	1.99
3.82	4.1	3.66	0	0	3.05	1.59	2.45
3.69	3.6	0.7	3.21	2.51	0.32	4.21	3.91
3.11	3.36	3.33	1.88	2.51	2.25	5.3	2.39
1.21	0.75	0	0	0	0.22	0.86	1.79
0	0.05	0	0	0	0	0	0.17
1.56	0.73	1.7	0	0	0.96	0.34	0.26
3.54	0.21	0.3	0	1.34	0	1.91	3.02
2.31	0.3	0.75	0	0	0	4.19	3.67
4.1	0	0	0	0	0	2.2	1.32
1.09	0.71	0.3	0	0	2.97	1.58	2.88
4.16	6.4	4.08	0	0	3.69	0	3.21
6.43	0.6	1.09	0	0.24	4.03	2.78	2.24
3.62	0.19	0.31	0.58	1.14	2.99	3.39	2.84
3.82	3.09	1.19	1.72	4.92	3.19	2.12	5.17
1.08	0.79	0	0	1.09	2.8	1.05	0.65
0.66	1.15	0.19	0	0	0	0.95	0.07
0	3.15	1.69	0	0.87	1.05	1.06	2.05
1.44	3.3	1.52	0.25	0.69	1	0	0
2.77	3.46	0.1	1.21	0.61	1.01	2.16	3.06
1.62	0.67	0.25	0.2	0.82	1.24	4.44	4.41
1.49	1.11	0.79	3.2	3.93	2.92	4.92	3.2
1.25	2.39	0.62	2.49	2.8	1.77	4.26	0.28
2.09	0.9	0.55	2.11	3.22	1.08	1.19	1.21
2	0.4	0.53	3.2	2.19	1.4	2.58	0.64
3.39	2.56	1.57	2.19	3.4	1.39	1.97	1.39
0	0	0	0	0	0	1.25	1.5
0.84	0.67	0	0.05	0	0	0	0.2
0	0	0	0	0	1.45	1.85	0
0	0	0	0	0	0	1.24	0.5
0.81	0.82	0	0	0	0.91	1.01	0.62
0.5	0.79	0	0	0.5	2	2.01	0.85
1.51	0	0	0	1.8	0.49	1.2	3.2
5.24	3.56	1.31	0.39	1.52	0.4	3.2	3.25
1.3	2.5	0	0	1.6	3.48	2.77	2.5
0	0.31	0	0.71	2.1	1.36	3.71	2.69
3.67	0	2.8	2.28	0.71	2.44	1.8	0.91
0	0	0	0	0	0	2.39	0.49
2.7	0	2.2	0	0	0.45	0	0
0	1.08	0	0	0	0	0	0.6
0	0.5	0	0	0	0	0.3	1.2
1.19	0	1.3	0	1.62	1.95	1.4	1.39
2.94	0	2.11	0	0	2	1.67	0
0.91	0	0	0	0	2.69	1.1	2.47
1.07	0	0	0	0.1	1.06	2.55	2.5
2.39	0.69	0	1.8	1.91	0.88	1.58	1.24
0.79	0	0.19	1.78	1.59	1.25	2.08	1.49
1.09	0.16	0	1.59	1	3.6	2.71	1.39

## Sheet: Fig.3(B)
N (cm)	E (cm)	S (cm)	W (cm)		N:	North
0	0	0	0		E:	East
0	0.05	0	0		S:	South
0	0.2	0.15	0		W:	West
0.25	0	0	0
0	0.12	0	0
0	0	0	0
0	0	0	0
0.46	0	0	0
0.1	0	0	0
0	0.51	1.1	0.25
2.51	3.11	2.19	3.66
0	0.16	0.11	0
0.3	0.02	0	0
0	0.05	0.15	0.25
0.15	0.22	0.31	0
0.25	0.12	0.1	0
0.4	0.24	0.32	0.05
0.39	0.56	0.06	0.69
0	0.95	1.15	0.99
0	0.75	1.19	0.72
0	1.49	1.55	1.55
2.89	2.9	1.38	3.1
0	0.21	0	0.45
0	0.09	0	0
0	0	0	0
0	0	0	0
0	0	0	0.22
0	0	0	0
0	0	0	0
0	0.21	0.66	0.21
0	0	0	0
0.41	0.25	1.51	0.21
1.38	0.65	2.98	0.71
0	0	0	0
0	0	0	0
0	0	0	0
0	0	0.41	0
0	0	0	0
0	0	0	0
0	0	0	0.38
0	0	0	0
0.89	1.68	0	0
1.61	1.71	1.81	1.15
2.61	0.05	1.39	3.01
0	0	0.35	0.31
0.71	1.12	0.32	0.38
0.61	0	0.41	0
0	1.45	0.15	1.22
0	0	0.1	0.43
0.95	0	0.15	0.26
0	0	1.05	0
0	0	0.61	0.25
0	0.42	0.98	0.49
2.32	1.52	2.43	1.6
2.21	1.5	3	2.95
0	0	0	0
0	0	0	0
0	0	0	0
0	0	0	0
0	0.15	0	0
0	0	0	0
0	0	0	0
0	0	0	0
0	0	0.3	0
1.09	1.69	0.51	0.12
1.55	1.75	1.09	0.89
0	2.57	1.21	0
0.41	0.52	0.24	0.92
0	1.71	0.8	0.71
0	0	1.12	0.12
0	1.05	0.25	1.52
0.11	0	0.27	1.89
3.68	0	0.46	2.76
1.95	0	0.32	2.37
1.75	0.51	0.3	1.44
3.7	0.61	0	0.5
2	7.99	0.71	2.45
0	0	0	0
0	0	0	0
0	0	0	2.25
0	0.1	0	0
0.52	0	0	0
1.23	0	0.69	1.15
0	0	0	0.51
0	1.61	0.6	1.72
0	0.82	1.12	1.51
0	3.25	1.24	1
0	4.3	1.2	1.32
0.5	2	0.2	1.9
0.25	1.65	0.55	1.42
0	0.39	0.15	0.48
0	0	2.4	0.42
2.62	0	0.78	1.01
0.51	1	1.12	1.4
3.3	0.35	1.51	1.41
0.25	0.21	0.99	1.51
0.19	0.2	4.72	1.62
1.05	0.56	0.55	1.42
0.78	0.69	1.15	2.45
0.21	1.5	0.61	0.51
0.1	0.58	0.2	0.27
1.23	0.62	0.66	0.12
2.01	0.91	1.01	2.01
1.39	0.21	1.89	0.49
0	0	3.5	0.26
0.98	1.51	2.67	1.08
0.71	1.41	0.7	3.57
1.49	0.44	1.08	1.25
0.39	2.58	0.89	1
0.9	3.61	2.88	1.21
1.45	2.7	1.62	1.27
0.67	0.5	0.31	2.51
0.5	0.3	0.52	3.4
0.32	0.25	1.35	0.32
0.61	0	0.51	0.3
0.52	3.75	1.9	1.65
0.51	0	0.1	0.87
0.23	0.4	1.51	1.12
0.16	0.65	1.32	0.7
1.27	2.1	1.68	0.16
1.71	1.51	1.62	0.72
1.27	0	0	1.45
0.75	0	0.25	2.95
1.8	1.95	0.2	0.75
0.85	0	1	0.32
0.45	0.12	0.82	0.21
0.5	1.41	1.03	1.31
0.76	0	1.52	2.5
1.15	0.1	2.37	2.49
1.78	0.65	1.5	4.01
1.66	0.61	4.25	1.12
2.89	0.9	1.9	0.7
0	0.68	0.21	0
0.52	0.26	1.35	0.25
0	0.27	0	0.56
0.56	0	0.26	0
0	1.36	0.21	0.41
0	0	2.18	0
0	0	0	0
0	0.79	0.69	0.62
0	0.81	0	0.25
1.28	0	0	1.23
0.67	0	0.6	2.35
0	0.72	1.76	0.3
0.05	0.42	0	1.36
0.41	0	0.7	0.49
0	0.1	0.5	2.16
0	0.5	0	1.15
0.14	0.39	0.54	1.24
0	0	0	0.65
0.39	0.27	0	1.53
0.35	0	0.48	1.39
1.15	0	0	2.45
1.72	1.69	0.62	2.57
0	0.47	0.67	0.11
0	0.31	0.65	0.59
0	0	0.29	0
0.34	0.72	0.2	0.46
0.1	0.39	0.37	0.69
0.15	0.77	0.2	0.39
0.51	0	0.1	0.69
6.15	6.54	0.73	5.01
0.61	4.18	0.15	5.39
0.9	0.39	0	4.58
0	0.15	0.22	2.51
0	0.26	0	0
0.2	0	0	0
0.3	0	0.32	0
0	0	0	0
0	0.1	0.12	0
0.2	0	0.47	0
0	0.28	0.21	0
0.79	1.32	0	0.67
1.02	1.28	0.21	0.52
0.78	0.59	0	1.51
0	0.15	0	2.69
0	0.48	0.9	0.88
0.4	1.6	1.49	0.22
0.05	0.33	0	0
0	0.49	0	0
0	0.2	0.61	0
0	0.89	1.12	0.95
0.49	1	0.3	2.37
1.42	1.8	0.7	2.19
1.57	2.14	0.29	2.1
2.16	0.25	0.32	2.28
2.88	0.81	0	4.41
0.1	0.14	0	0
0.51	0	0	0.35
0.1	0	0.1	0.47
0.9	0	5.16	0.49
2.24	0	0.11	1.97
3.11	0	0.51	1.11
0.79	2.27	0.97	2.12
1.37	0	0.62	1.54
0.16	1.45	0.7	2.06
0	0.77	0.72	0.31
0	0.17	0.71	1
0	0	0	3.39
0	0	0	0
0	0	1.95	0
0.36	1.06	0	0
0	0	0	0
0	0	0	0
0.19	0.15	0	1.29
0	0.52	0	0
0.05	0.37	0	0
0.38	0.3	0.89	0.59
1.45	0	1.52	3.7
0	0	0	0
1.1	0.7	0	0.38
0.59	0	0.39	0
0.79	0.72	2.24	0
0	0.25	0	0
0	0	0.42	0
0	0	0	0
0	0.76	0	0
1.16	0.68	0.64	0
0	1.2	1.41	1.5
3.02	0.92	2.06	3.47
0.5	0	0	1.2
0	0	0	0.49
0	0	0	0
0	1.14	0	0
0	0	0	0
0	0	0	0
0	0	0	0
0	0.7	0	0
0	0	0	0
0.61	0.29	0	1.56
2.44	1.3	0	0.78
0	0	0	0
0	1.45	0	0
0.9	1.19	0	0
0	2.45	2.3	0
1.49	0.8	1.59	1.25
2.88	0.39	2.94	1.5
0.59	0.7	2.99	2.95
1.49	1.5	0	0
0	3.01	1.42	0
1.8	3.55	2.95	0
3.8	2.06	1.11	0.75
0	1.7	0	0
0	0	0	0
0	2.46	2.26	0
0	0	2.32	0.29
0	0	2.19	0
0	1.3	0.79	1.59
0	0.55	0	0
1.65	1.4	0	0.7
0.91	1.32	1.59	0.86
1.71	3.17	3.09	3.33
3.2	2.1	2.4	3.57
0	0	0	0
0	0	0	0
0	0	0.51	0.57
0	1.55	0	2.98
0	0.5	0	0
0.88	1.49	1.1	0
0.6	2.95	0.55	0
0	1.87	1.2	3.26
1.15	2.1	2	0.5
2.31	2.62	2.8	3.5
11.9	3.34	2.37	2.42
0	0	0	0
0	0	0	0
0	0	0	0
0	0	0	0.12
0	0	0.74	0
0	0	0	0.24
0	0	0	0
0	0	0	0
0	0	0.65	0
0.55	0.62	0.98	0
0.49	0.81	0.39	2.19
0	0	0.15	1.9
0.74	0.54	0	0.53
0	1.06	0.34	0.22
1.2	0.32	0	0.35
2.25	1.1	0.35	0.74
0.72	0.35	0.76	0.2
3.49	0.98	0.4	0.5
0.2	1.72	1.25	1.1
0.61	0.25	0.74	0.71
1.75	0.3	2.21	5.1
0.53	0.7	0.9	2.39
0	0	0	0
0.45	0	0	0.1
0.24	0	0	0.15
0.25	0.06	0	0
0	0	0.2	0
0.2	0.15	0.37	0.55
0.2	0	0	0
0.04	0	0	0
0.51	0	0	0
1.55	0	0.25	0.59
0	0	0.2	0.72
0	0	0.76	0
0	0	0.25	0.3
0.39	0	0.3	0
0.25	0.51	0.91	0.15
0	0	0.2	1.25
0.09	0	0.65	0
0	0.2	0	0
0	0.71	0	0
0.39	0.25	1.05	0
1.37	1.25	1.1	1.2
1.61	2.39	1.32	0.59
0.34	1.31	0	0.75
0.03	2.56	1.82	2
0	0.19	0.56	1.06
0	0.25	0.24	0.25
0	0.34	1.57	0
0	0.55	0.59	0.24
0	0	0.39	0.34
0	1.41	0.07	0.4
1.45	1.69	0	1.82
0.79	0.6	2.95	1.92
0	1.41	0	3.1
0	0.82	0	1.51
0.3	0	0.8	1.22
0.05	0	0	2.31
0	0.05	0	3.01
0.27	0.55	0	2.26
0.35	0.51	2.09	3.24
0	1.32	2.49	1.56
0.51	0.35	1.91	1.05
0.39	0.69	1.24	1.49
0.71	0.62	3.22	1.66
1.28	1.22	1.25	3.12
0	1.35	4	1.72
0.89	0.75	1.73	2.01
0.71	0.32	1.52	2.93
0.51	1.39	3.01	2.2
0.46	0.68	1.52	1.63
1.32	2.46	0.63	2.33
1.36	2.49	0	4.51
1.7	3.05	0.59	3.02
2.22	1.68	0.5	2.69
0	0	2.68	1.38
0	1.01	0	0
0.49	0.2	0	0
0.63	0	0	0
0	0	1.65	0.39
0.51	0.17	0	1.51
0.77	0	1.34	0.25
0.9	1.36	0.59	2.77
0.59	0.6	0.55	1.25
1.12	2.75	0	1.29
1.37	2.32	0.61	2.27
1.52	2.21	2.57	2.89
1.4	2.9	2.1	4.92
0.52	1.56	1.1	1.15
0.3	0.6	0.19	2.3
0.71	0.51	1.52	1.7
0.72	1.29	2.21	1.39
0.53	1.51	2.4	1.67
1.05	2.1	1.3	0.72
0.83	4	0.95	1.97
1.95	2.83	0.46	2
1.7	2.91	2	3.35
0.88	3.86	1.51	2.15
0	2.41	2.43	2.45
0.38	0.24	0	0.97
0.02	1.13	0.25	0.47
0.65	0.54	0.1	0.31
1.35	0.88	0.7	0
0.29	2.82	0.86	1.09
1.55	0	0.27	2.15
1.59	2.46	0	1.45
3.01	1.54	1.76	1.01
2.54	3.37	1.8	3.99
6.21	3.24	3.75	3.56
4.15	5.98	1.85	4.37
0	1.23	0	0
1.42	0	1.24	1.52
0.51	0	0	0
0.52	0	0	0
0.79	0	0	0
1.39	0.2	0	0
1.85	2.35	1.66	0
3.37	4.24	0	1.99
5.24	3.86	0.5	1.34
4.06	4.24	1.62	2.53
1.99	1.77	1.72	1.77
0	0	0	0.39
0.05	0	0	0.1
0.29	0.39	0.95	0.12
0.52	0.67	0.25	0.39
0.43	0.85	1.78	0
0	0.52	0	1.02
0.88	0	0	0
1	1.15	0	0
4.19	2.59	0	1.49
6.41	5.19	0	3.41
5.22	5.51	4.47	4.34
1.98	2.51	0	1.6
1.77	0	0.78	0.7
0.6	0.19	2.14	2.08
3.15	0.22	0.51	2.99
2.14	3.98	1.87	0.9
1.39	2.47	0	2.5
1.41	0	0	0.89
3.01	0.89	0	3.99
3.69	4.95	0	3.81
1.47	6.04	1.21	6.44
0	2.01	0.52	4.69
1.63	1.21	0.56	0
0.78	0.24	0.01	0.56
0.7	0.5	0.2	0.7
0.95	0.05	0	0.1
0.59	0.04	0.01	0
0.71	1	0.35	1.01
0.99	0.3	0	0
2.53	2.34	3.45	3.69
2.21	3.44	3.56	3.24
3.33	3.22	0	1.66
2.23	3.45	2.34	1.13
0	1.41	0	0
2.21	1.85	0	0
1	0	0.48	0.5
0.49	0	0.01	0
0.95	0	0	0
1	0	0	0
2.24	3.6	0.9	0.05
1.65	2.06	0	1.15
3.95	1.57	0.41	1.84
5.55	3.57	1.15	3.9
4.47	1.95	3.88	5.14
0	0	0	0.01
0.09	0.55	1.71	0.21
0	0	0.52	2.63
0	0	0.21	0.8
0.31	2.11	0.5	0
0	0	0	0.55
0	0	0.64	0
1.27	0	1.61	0.39
1.41	0.49	2.66	3.95
0	1.38	3.72	5.22
0	2.49	0	3.05
0	0	0	0
0.41	0.71	0	0
0	0.35	0	0
0	0.49	0	0
0.51	0	0	0
0.23	0	0	0
0	0	0	0
0	0	0	0.29
1.71	4.22	0	0
1.25	1.06	0.5	0
0	0.42	0.32	3.22
0.09	0	0	0.61
0.15	1.45	3.12	1.82
0.32	0	0.67	1.96
0.19	0.52	0.3	0
0	1.55	0.19	0.61
0.72	1.13	1.31	3.67
1.49	5.2	0.69	2.12
2.55	4.99	0.56	0.82
1.77	1.15	0.69	4.06
2.68	0.49	0.21	0.34
2.02	0.32	0.71	0.92
5.01	4.24	0	4.72
0	5.21	0	1.31
2.61	0	0	1.5
2.55	2.12	0	1.89
2.54	4.31	5.54	3.61
1.62	2.12	0	0.2
0.61	1.15	1	1.72
0.99	6.45	1.65	1.15
1.23	1.34	1.12	1.52
2.42	0.67	4.99	4.15
0.6	2.82	1.98	0.53
0.2	0	0.92	0
0.2	1.12	0.21	0
1.02	1.1	0.12	0.52
0.99	3.5	0.05	0
0	2.49	0.78	0
1.12	1.59	2.15	0.72
5.34	4.42	4.62	5.98
2.72	6.99	1.88	4.44
0.99	5.72	4.88	0
0.61	2.48	1.99	0.4
0	9.21	1.5	0
0	0.1	3.72	3.81
3.85	0.05	0.31	2.61
0.1	0.05	1.1	0.51
4.55	0	0	0
3.52	0	0.95	0.99
1.05	0.98	0.3	0.92
0	0.99	1.72	1.12
0.38	0.49	2.15	2.11
0.11	0.51	0	0
1.12	1.41	0.34	1.1
0.71	0.46	1.21	0.51
0	0.62	0.5	0.47
0	0.65	2.53	1.69
1.56	0.05	0	0.65
1.65	0.21	1.5	1.1
0.01	0.62	0.62	2.88
0.8	0.9	0.39	0.61
0.85	0.62	0.42	1.21
2.39	3.15	3.25	3.56
1.24	0.2	3.88	3.42
0.19	0.89	2.67	1.59
0.01	0.39	0.42	1.05
0.37	0	0	0.21
0	0	0	0.03
0	0	0	0.03
0	0	0	0
0	0	0	0
0.05	0.19	0	0
0.27	0	0	0
0.29	0.69	0.05	0.01
0.19	0.51	0	0
0.12	1.13	0.91	0.3
0.41	1.19	0.78	0.54
0	0	0	0
0	0	0.01	0
0	0.52	0	0
0	0	0	0
0.17	0	0	0
0	0	0	0
0.11	0	0	0
0	0	0.12	0
0.62	0	0.61	0
0.71	0	0.39	0.32
3.39	0	0.71	0.59
0	0.01	0.02	0
0	0.1	0.01	0
0	0	0.65	0.1
0	0	0	0.07
0	0	0.31	0
0	0	0.1	0
0	0	0.15	0
0	0	0.19	0
0	0.39	0.09	0.93
0	1.72	0	1.79
0	0.99	0.39	3.95
0.71	0	0	0.05
0	0	0	0
0.69	1.11	0	0
0	0	0	0
0	0	0	0.73
0.25	0	0	0
3.29	0.18	0	0
0	0	0	0
0	1.81	0	0
0.39	1.36	0.15	0.75
0.71	0.69	0	0.82
0.05	0.77	0.69	0
0.06	0.1	0	0.04
0.05	0.05	0	0
0.1	2.66	0	0
0	1.2	0	0
0	0	0	0
5.42	2.56	0.78	2.46
0.29	4.39	2.19	0.06
0.5	4.87	3.34	0.91
4.48	0.12	0.39	1.45
0.27	0.1	0.28	0.22
2.01	1.39	0	0
2.81	0.28	0	0.11
0.09	0.05	0	0
0.71	0.11	0	0.09
0	1.1	0	0
0	0	0	0
0	0.11	1.71	1.52
0	0.38	0.42	0
0	0	0.12	0.29
0.66	1.21	0.24	0.91
1.01	3.23	0.32	0
0.31	0	0	0
0	0	0	0
0.1	0	0	0
0	0.02	0	0
0.35	0	0	0.05
0	0	0.25	0
0	0	0.73	0
1.2	2.49	0.1	0.21
2.9	0.99	1.99	0.51
2.66	4.32	3.01	0.16
0.51	0.45	0.7	3.2
0	0	0	0
0.13	0	0.32	0.05
0	1.27	0	0
0.06	0	0	0
0	0.14	0	0
0.03	0	0	0
4.19	0	0	0
0	0	0	0
0.65	1.24	0	0
1.04	0.43	0	0
2.77	2.51	0.8	0
0	0	0.01	0
0	0	0	0.05
0	0	0	0
0	0	0.11	0
0	0.45	1.02	0
0	0	0	0
0	0	0.51	0
4.54	0	0.05	0.32
2.85	0	0	0
0.2	0	0.05	0
1.29	0.2	0.22	0.29
4.87	0	0	4.34
4.65	0	0.61	3.16
0	0	0.2	0
0	0	0	0
0.3	0	0	0.61
0.77	0.25	0	2.49
3.05	2.71	1.07	1.75
3.78	2.1	2.47	4.24
0.67	0.95	1.22	1.32
1.85	0	0.5	3.86
1.11	1.5	1.49	1.71
2.27	2.98	0.3	2.82
2.99	4.02	3.24	3.45
1.42	2.92	3.5	1.82
3.99	5.89	0.42	4.01
2.78	3.7	5.72	2.05
2.5	0.46	0.55	2.39
3.21	3.98	0.51	5.49
1.54	0.96	0.39	2
1.8	0.6	8.56	1.24
1.1	1.01	0.49	1.06
0.39	0.79	1.41	0
3.39	7.79	0.72	1.21
3.66	0.4	0.5	1.71
1.94	0.34	0.39	3.21
4.99	3.67	0.9	4.19
3.2	2.79	3.82	5.24
1.57	0	3.21	1.21
4.89	0.56	2.25	2.74
2.12	3.01	3.22	1.18
3.21	2.11	0.24	3.68
4.23	0.99	0.6	1.5
2	1.01	1.19	1.01
0.56	0	0.15	0
0.2	0	1.39	1.32
0.54	1.21	0.31	0.41
1.21	0.71	0.22	2.05
1.68	0	0	2.11
0	5.41	0.65	6.32
1.12	0.88	0.05	3.44
0	9.23	0.51	4.21
0	0.05	2.39	1.19
0	1.24	2.88	1.62
0	3.5	0.22	1.89
2.11	0	3.5	0.41
0.54	0	2.88	0.62
0	0	0	2.71
0	0	0	0.49
0.34	0	0	0.39
0	4.05	0	0
0.99	0.11	0	4.24
0	0.3	0	0
0	4.61	4.11	3.21
1.55	1.89	0	0
0.53	4.55	0	2.11
0	0.32	0	0
0	0.02	0.33	0
0.32	0.31	0.01	0.05
0.89	0	0.01	0.02
4.15	2.55	4.99	3.92
1.32	0	0	0.61
0.74	0.1	0.5	1.78
1.61	0.41	0.78	1.11
2.55	0.61	1.55	1.45
7.35	0.62	1.2	5.87
0.7	1.88	0.95	1.12
0	0	0	0
0	0	0.43	2.78
0	1.31	1.21	1.12
0.89	0.29	1.12	0.34
0.34	0.15	0	0
6.26	2.71	1.49	3.78
0.87	0.85	0	0.12
0.12	0.31	0.51	0
0.35	0.56	0.61	0.78
3.21	0.35	0.78	0.89
0.23	0	0.65	1.89
0	0	0	0
0	0	0	2.57
0	0	0	0
0.45	0	0	0
0	0	0	0
0	0	0	0
0	0	0	0
0	0	0.87	1.21
0	0	0	0.25
1.1	0	1.23	1.89
1.31	0.42	2.1	3.1
0	0	0	2.12
0	0	0.54	0
0	0	0	0
0	0	0.42	0
0	0	0	0
1.1	0	0	1.21
0.87	0.89	1.21	1.32
0	0.42	4.32	0
0	0	0	0
0.78	0	0	1.21
9.56	6.32	7.84	11.67
0	0	0	0
3.56	2.11	0	1.12
0	0	0	0.81
0	0	0	0
0.34	0	0	0
0.51	0.25	0	0.69
0	0.24	0.2	0
1.51	0.68	3.78	2.31
0.44	1.12	1.51	4.21
0	1.19	7.21	3.21
3.21	0.55	0.89	6.81
0	0	0	0
1.1	0	1.9	0
0	0	0	0
0.68	0	0	0
0	0	1.61	3.15
3.91	2.12	0	0
0	0	0	1.1
0.79	1.09	4.51	0.8
2.31	0	0	7.12
0.39	1.25	0.81	0.81
1.41	2.01	3.15	7.22
0	0	0	0
0	0	0	0
0	0	1.72	0
2.77	1.31	0	2.89
2.99	1.25	0.81	1.78
3.78	2.42	1.41	2.45
0	1.23	0	1.43
4.56	1.21	2.72	2.97
2.75	3.61	4.78	1.52
4.01	0	4.1	4.78
1.45	3.47	3.45	0
0	0	0	0
0	0	0	0
1.25	0.61	1.21	0.61
0.45	3.72	0.45	1.57
2.62	2.81	2.32	2.11
1.47	0	3.77	3.1
1.41	2.92	2.54	2.55
3.21	0	1.87	1.39
1.89	0	6.43	1.5
3.15	0.41	2.32	3.21
1.78	0.79	1.71	3.05
0	0	0	0
0	0	0	0
1.06	1.05	1.72	1.02
1.87	1.62	0.5	1.81
1.6	1.65	0.25	2.62
1.31	0.77	2.6	1.62
1.4	0.6	0.65	3.21
2.32	3.21	0.67	2.75
3.15	2.42	1.95	2.83
2.15	5.22	3.55	1.25
0	4.99	0.75	0
0	0	0	0
0	0	0	0
0.56	0	1.62	1.99
0.21	1.24	0.42	2.02
0.62	0.72	0.73	1.86
1.32	0	1.42	0
0	0.67	2.34	0.39
2.79	2.42	2.76	2.45
3.45	1.67	4.45	4.48
3.55	0.89	1.32	3.42
3.24	5.67	1.36	0
0	0	0	0
0	0	0	0
0.78	0.87	0.42	0.81
1.21	1.05	1.55	1.32
0.41	0	1.35	1.67
0.64	0	1.65	1.21
0	0	0	1.15
0	0	3.15	1.59
1.15	1.07	1.36	1.13
2.21	1.55	1.72	1.54
0	0.49	2.49	0
0	0	0	0
0	0	0	0
0.67	0	0.35	1.35
0.35	0	1.34	2.15
0.54	0	1.87	0.85
0.95	0	0	0.65
0.65	0	0	2.35
3.35	1.22	3.89	4.85
1.67	0.78	4.79	3.21
1.89	0.45	4.99	2.67
1.84	2.32	0	1.25
0	0	0	0
4.32	0	0.25	2.35
2.45	1.67	3.78	2.7
0.43	0	2.45	2.35
1.99	0	3.15	1.5
0.99	0	0.89	1.42
0.49	0	2.12	1.32
2.55	1.67	0	1.25
2.12	0.45	1.67	1.99
2.89	0.67	3.45	2.54
0	0.54	0	0
0	1.01	0.8	0
1.25	0.74	0	1.21
0.45	0	0.36	1.42
0.56	0	0	0.85
0.68	0	0	0.72
0.24	0	0.5	0
0.94	3.25	1.66	2.23
2.34	0	0.45	1.67
2.25	1.25	4.21	1.85
1.55	2.67	4.32	1.54
0	0.79	1.15	0
0	0	0	0
0	0	1.34	0.8
1.12	0.34	0.99	2.15
3.67	0.29	0.1	1.56
3.45	0	1.95	1.79
3.45	0.25	2.95	1.54
2.67	0.45	2.41	1.99
3.43	0.76	1.67	2.67
2.79	0.34	1.67	2.15
2.79	1.25	0.51	1.75
2.2	0.61	1.32	0
0	0	0.24	0
0	0.15	0.1	0.49
0	0.1	0.39	0.39
0	0.4	0	0.14
0	1.15	0.49	0.61
0	0.72	0.01	0.41
0	0	0.05	1.34
0	0.19	0	2.1
0	0	0	1
0	0	0.99	1.49
0	0.33	0.1	0.41
0	0.65	0	0
0	0	0	0
0.1	0	0	0
0	0	0	0
0	0	0	0
0	0	0	0
0.72	0	0	0.15
0	2.35	0.31	0.25
0.61	0.86	0	0.19
1.39	2.03	0.91	1.79
0.88	2.1	0.69	2.7
0	0	0	0
0	0	0	0
0	0	0	0
0	0	0	0.39
0	0.05	0.21	1.05
0	1.12	0.34	0.47
0	0.51	0.23	0
0	0.45	0.42	0.1
0	0.36	0.77	0.74
0	1.14	0.14	0.21
0	0.37	0	0
0	0	0	0
0	0	0	0
0	0	0	0
0.1	0	0	0
0.78	0	0	0
0.15	0.61	0	0
0.21	0	0	0
0.52	0	0	0.11
0.29	0.89	0	0.42
0.8	0.71	0.41	0.41
0.5	0.55	0.47	0.51
0	0	0	0
0.39	0	1.29	0.25
1.6	0	0.25	0.51
1.62	0	0.45	0.79
1.75	0	0.75	0.5
1.2	0	0.2	1.01
1.71	1.05	0.71	0.59
0.92	0.71	1.25	1.11
2.12	0.6	2.5	1.5
2.36	0.71	1.2	1.38
1.59	1.5	2.1	1.25
0	0	0	0
0	0	0	0
0	0	0	0
0	0	0	0
0	0	0	0
0	0	0	0
0	0	0	0
0	0	0	0
0	0	0	0
0.92	0.35	0	1.5
0.46	0.29	0.71	1.69
0	0	0	0
0	0	0	0
0	0	0	0
0.15	0	0	0
0	0	0	0.8
0	0	0	0
0	0	0	0
0	0	0	0
0	0.1	0	0
0.45	0	0.14	0.5
0.69	0	1.56	0.39
0	0	0	0
0	0	0	0
0	0	0.29	0
0	0	0.3	0
0	0.05	0	0
0	0	0.94	0
0	0.24	0	0
0	0	0	0
0	0.25	0	0.19
0.61	0	0.69	0
1.25	1.95	1.07	1.72
0	0	0	0
0.04	0	0	0
0	0	0	0
0	0	0	0
0	0	0	0
0	0	0	0
0	0	0	0
0	0	0	0
0	0	0	0
0	0	0	0
1.21	0	1.65	0
0	0	0	0
0	0	0	0
0	0	0	0
0	0	0	0
0	0	0	0
0	0	0	0
0	0	0	0
0	0	0	0
0.7	0.51	0	0
0.28	0	0	0
2.39	3.39	2.01	0.2
0	0	0	0
0	0	0.05	0
0.13	0	0.15	0.05
0	0	0	0.18
0	0	0	0
0.14	0.07	0	0
0.15	1.39	0.89	0.77
0.52	0.39	0.19	2.55
2.14	1.09	0.8	1.69
2.73	0.31	1.22	4.23
1.98	0.59	0.69	0.39
0.24	0	0	1.18
0	0	0.2	0.25
0.25	0.2	0.15	0
0.224	0	0	0
0	0	0	0
0	0	0	0
0	0	0	0
0	0	0.69	0
0.06	0.51	1.11	0.9
4.71	2.79	0	0.79
2.34	0.89	0.49	4.41
0	0	0	0
0	0	0	0
0.39	0	0	0
0	0	0	0
0	0	0	0
0	0	0	0
0	0	0	0
0	0	0	0
0	0	0	0
0.69	0	0	0
2.1	3.39	0	0
0	0	0	0
0.25	0	0.08	0
0	0	0	0
0.24	0	0	0
0	0	0.05	0
0	0	0.04	0.02
0	0	0	0
0	0	0	0
0.21	0	0.01	0.32
1.72	0	0.37	0.22
2.34	1.62	0.25	2.15
0	1.9	0.2	0
0	1.99	0	0
0	0	0.4	0
0	0	0	0
0	0	0	0
1.45	0.78	0	0
1	2.85	1.41	0
4.5	2.89	5.71	0
6.69	4.78	2.56	0
3.45	5.71	6.99	0
3.5	4.32	2.24	7.55
0.2	0	0	0
0.18	0	0	1.97
1.74	0	0	0.11
0.05	0	1.91	3.36
4.66	0	0	1.75
0	0	0.51	1.47
0	0	1.01	2.66
0.7	0.49	4.11	1.43
2.36	0.99	2.59	2.09
1.88	4.25	4.38	3.16
0.76	0.72	3.06	2.51
0.65	0	0	0.69
0	0	0	1.06
0	0	0	0.75
0	0	4.55	0
0	0	0	0
0	0	2.51	2.41
2.37	1.46	4.61	0.81
4.05	0	2.25	1.94
2.77	1.58	3.59	3.12
4.31	0.37	2.3	1.97
0.39	1.79	1.47	3.62
0	0	0	0
0	0	0	0
0	0	0	0
1.6	0	0	0
0	1.27	0	0
0.12	0	0.62	0
0.46	2.5	0	0
0	0	0	0
0.51	0	0	0
1.21	0	0.72	0.4
0	0	0.12	0.92

## Sheet: Fig.4
DBH (cm)	EB biomass (g)
11.97	194.86
13.82	222.1
12.78	202.63
16.17	242.26
10.37	85.68
15.26	193.57
17.96	266.05
14.5	164.59
13.32	191.85
41.83	411.42
19.91	163.44
23.66	187.07
16.46	169.46
18.12	79.39
39.9	351.06
21.84	156.31
26.9	139.56
17.9	228.28
21.81	240.28
10.15	90.59
12.85	62.71
13.5	88.75
23.25	191.32
10.79	34.04
97.8	1425.4
16.86	211.72
12.58	136.36
11.37	141.36
40.19	62.64
55.97	155.1
59.8	214
37.43	148.86
55.65	158.29
90.68	931.95
50.22	207.97
27.47	149.33
10.78	24.71
11.89	128.54
11.36	26.57
10.69	54.32
19.86	168.43
39.17	553.27
24.28	153.85
21.35	104.62
17.67	195.44
27.64	216.92
11.25	202.81
16.7	197.14
18.48	321.52
55.22	684.89
14.6	295.6
21.66	416.38
12.81	169.47
11.39	137.43
15.8	284.22
10.91	166.55
16.66	236.38
13.21	119.03
11.06	46.39
34.7	385.06
26.71	560.66
25.49	367.61
41.59	479.55
12.74	168.44
22.76	350.35
18.65	370.14
19.66	320.51
15.21	159.45
10.65	139.41
31.45	520.65
12.36	34.76
13.27	36.53
19.72	74.66
16.2	62.01
15	135.57
32.47	177.65
13.97	81.51
10.38	73.1
11.67	45.21
17.8	56.26
35.92	737.3
13.38	177.67
57.1	1060.42
40.54	1140.16
32.67	578.46
22.36	471.88
12.76	290.71
16.78	405.22
27.26	618.99
42.25	641.68
28.16	231.08
26.01	233.69
40.16	494.48
30.31	419.19
43.52	463.63
35.65	292.67
23.13	151.02
13.05	297.35
17.8	193.22
10	121.76
22.27	360.25
26.13	467.93
10.17	92.24
20.24	194.75
14	55.86
18.51	190.84
12.1	160.02
25.09	330.88
15.16	166.95
34.21	552.01
28.56	42.05
30.34	187.93
14.11	57.47
16.76	80.19
10.68	37.28
19.23	52.3
36.42	355.61
21.96	115.37
40.28	810.77
16.89	190.53
19.8	33.1
18.27	27.4
14.42	41.35
10.45	8.32
12.54	29.51
13.46	89.71
10.1	67.4
14.05	23.41
15	40.62
85.4	392.96
48.2	528.47
109.41	1932.37
35.95	275
34.67	351.15
117.86	2433.84
15.71	230.02
46.24	734.3
70.66	653.66
103.7	911.01
78.8	1741.39
30.46	395.97
25.56	375.3
28.23	415.28
14.11	191.72
26.57	426.87
19.16	281.98
21.3	393.07
36.85	380.09
23.16	256.26
16.85	55.12
112.5	1688.74
128.7	1912.48
79.8	823.84
109.69	1875.9
80.91	606.6
18.26	216.34
13.5	87.63
50.8	688.23
56.95	936.68
123.61	2408.15
114.37	2856.6
76.52	990.91
65.91	1142.39
40.68	625.64
32.89	482.46
27.51	393.67
79.4	1268.83
85.21	1296.36
62.65	1021.46
10.15	177.25
40.16	314.21
15.6	176.85
23.23	259.3
35.3	297.93
11.55	166.64
13.15	160
17.85	246.14
49.86	433.61
71.28	940.93
8.35	63.58
26.18	304.54
42.65	256.21
28.6	299.6
21.82	212.13
48.97	506.76
26.25	223.85
23.78	163.99
23.33	142.83
24.62	241.32
30.78	181.51
9.22	32.49
10.89	75.85
99.35	480.35
24.75	147.75
69.5	406.28
58.56	193.11
15.18	45.67
7.63	32.28
16.22	131.96
8.35	21.6
63.66	727.36
68.96	1374.2
72.31	448.88
116.31	1500.83
54.86	599.38
108.85	1956.94
33.76	558.52
100.05	1195.13
113.31	1731.99
62.1	684.27

## Sheet: Fig.5
Measured EB biomass (g)	Predicted EB biomass (g)
13.312	12.8047
28.174	15.648
28.36	25.8406
105.012	31.3034
43.382	33.493
48.935	33.9193
30.812	33.9204
53.388	42.8398
54.584	52.2546
83.982	57.8229
18.462	76.4352
77.557	77.7649
169.602	98.0972
170.954	96.9068
105.546	116.555
95.738	133.507
148.017	193.452
21.458	204.603
127.227	224.928
183.083	279.627
183.724	321.234
171.615	321.781
427.499	366.044
307.507	376.708
317.804	395.783
482.795	394.32
382.793	471.556
104.17	790.468
1179.17	1215.86
1418.9	1329.26

## Sheet: Fig.S2
Height range (m)	Tree1 (%EB )	Tree2 (%EB )	Tree3 (%EB )	Tree4 (%EB )	Tree5 (%EB )	Tree6 (%EB )	Tree7 (%EB )	Tree8 (%EB )	Tree9 (%EB )	Tree10 (%EB )
0-1	85.817	59.3818	71.9985	43.457	32.193	60.6647	31.8994	62.1479	24.1814	55.1799
1-2	0.522876	10.2307	3.06499	18.0535	30.5102	26.1909	30.6827	8.74589	9.38557	11.8937
2-3	5.29412	20.2003	6.01504	13.7348	6.45411	7.4032	1.33644	14.1618	15.3958	2.91137
3-4	5.35948	2.43796	5.4212	1.09006	10.1803	3.23882	4.28351	4.21632	14.2794	2.79828
4-5	2.64706	4.50588	10.4257	21.2614	18.0341	0.737662	11.0671	5.13733	14.4358	9.26298
5-6	0.359477	2.06791	2.85427	1.84791	2.06315	1.28804	14.3644	3.09897	11.416	9.87943
6-7	0	1.17545	0.220296	0.555411	0.565027	0.476671	5.69829	1.74838	6.74109	3.65876
7-8	0	0	0	0	0	0	0.668218	0.743389	2.88065	3.10268
8-9		0	0	0	0	0	0	0	1.14383	1.0654
9-10				0	0	0	0	0	0.117447	0.208319
10-11					0	0	0	0	0.0229788	0.039113
11-12							0	0	0	0
12-13									0	0

## Sheet: Fig.S3
DBH (cm)	BD (cm)		DBH:	Diameter at breast height
11.97	18.47		BD:	Basal diameter
13.82	20.9
12.78	21.06
16.17	28.7
10.37	9.9
15.26	25.36
17.96	33.97
14.5	23.04
13.32	18.89
41.83	62.21
19.91	35.7
23.66	42.23
16.46	21.26
18.12	32.49
39.9	64.8
21.84	35.3
26.9	57.3
17.9	48.19
21.81	36.08
10.15	14.39
12.85	22.23
13.5	22.18
23.25	35.71
10.79	18.4
97.8	117.06
16.86	26.96
12.58	17.71
11.37	16.47
40.19	58.08
55.97	73.29
59.8	79
37.43	68.18
55.65	74.53
90.68	107.2
50.22	77.31
27.47	38.12
10.78	15.86
11.89	19.66
11.36	17.25
10.69	10.67
19.86	27.19
39.17	67.05
24.28	37.5
21.35	31.8
17.67	23.13
27.64	38.61
11.25	25.99
16.7	23.1
18.48	29.8
55.22	87.7
14.6	36.21
21.66	42.24
12.81	22.46
11.39	17.51
15.8	23.38
10.91	25.18
16.66	31.03
13.21	18.77
11.06	18.52
34.7	45.11
26.71	46.72
25.49	42.45
41.59	86.41
12.74	19.39
22.76	33.75
18.65	29.51
19.66	22.57
15.21	17.01
10.65	16.99
31.45	61.62
12.36	20.49
13.27	30.97
19.72	46.38
16.2	25.19
15	19.52
32.47	55.9
13.97	23.42
10.38	18.68
11.67	17
17.8	28.01
35.92	63.69
13.38	18.49
57.1	81.72
40.54	66.63
32.67	60.18
22.36	37.52
12.76	20.45
16.78	32.2
27.26	44.82
42.25	53.8
28.16	51.31
26.01	41.9
40.16	54.65
30.31	46.31
43.52	71.66
35.65	49.75
23.13	36.01
13.05	63.19
17.8	31.18
10	15.04
22.27	42.69
26.13	55.51
10.17	13.66
20.24	29.14
14	17.9
18.51	30.12
12.1	32.15
25.09	36.27
15.16	23.97
34.21	45.6
28.56	49.88
30.34	55.8
14.11	18.99
16.76	22.19
10.68	25.81
19.23	25.5
36.42	61.97
21.96	49.11
40.28	66.75
16.89	31.16
19.8	28.49
18.27	27.46
14.42	24.83
10.45	17.71
12.54	19.7
13.46	20.38
10.1	25.72
14.05	25.79
15	21.85
85.4	121.1
48.2	62.39
109.41	130.2
35.95	46.45
34.67	50.14
117.86	148.42
15.71	23.15
46.24	65.37
70.66	92.04
103.7	120.46
78.8	99.71
30.46	54.01
25.56	46.61
28.23	46.72
14.11	23.92
26.57	56.5
19.16	41.95
21.3	46.45
36.85	52.51
23.16	55.75
16.85	35.79
112.5	139.81
128.7	186.21
79.8	105.15
109.69	118.2
80.91	84
18.26	28.29
13.5	19.29
50.8	72.15
56.95	75.72
123.61	157.41
114.37	165.65
76.52	105.56
65.91	83.65
40.68	66.1
32.89	50.4
27.51	38.8
79.4	126.25
85.21	132.78
62.65	93.3
10.15	13.61
40.16	49.35
15.6	20
23.23	26.4
35.3	61.35
11.55	23.81
13.15	20.79
17.85	31.38
49.86	77.78
71.28	95.79
8.35	30.8
26.18	44
42.65	57.3
28.6	50.45
21.82	26.8
48.97	70.28
26.25	55.35
23.78	32.15
23.33	33.8
24.62	34
30.78	47.85
9.22	12.5
10.89	15.99
99.35	119.6
24.75	43.99
69.5	81.98
58.56	68.3
15.18	25.2
7.63	11.89
16.22	25.19
8.35	13.55
63.66	88.71
68.96	91.852
72.31	95.872
116.31	148.672
54.86	74.932
108.85	129.41
33.76	60.91
100.05	117.81
113.31	136.75
62.1	83.85

## Sheet: Fig.S4
HC DBH (cm)	JC DBH (cm)		HC:	Hinoki cypress
5	6.15		JC:	Japanese cedar
5	8.7
5.01	11.32
5.01	12.9
5.05	14.31
5.05	14.76
5.1	15
5.1	15.4
5.1	15.8
5.1	16.7
5.15	17.1
5.18	17.3
5.2	17.35
5.2	19
5.2	19.8
5.2	19.9
5.22	19.91
5.23	20.1
5.25	20.5
5.25	20.73
5.25	20.8
5.29	20.91
5.3	21
5.3	21.4
5.3	21.48
5.3	21.5
5.3	21.78
5.3	22.01
5.35	22.05
5.37	22.12
5.4	22.15
5.4	22.8
5.4	23.2
5.4	23.31
5.4	23.59
5.4	23.79
5.4	23.91
5.45	24.1
5.45	24.3
5.48	25.15
5.49	25.36
5.5	25.5
5.5	25.5
5.5	25.75
5.5	25.81
5.5	26.12
5.5	26.5
5.55	26.96
5.57	27.32
5.6	27.54
5.6	27.55
5.6	27.75
5.64	27.8
5.65	27.95
5.65	28.63
5.65	28.68
5.7	28.7
5.75	28.99
5.75	29.09
5.76	29.26
5.8	29.3
5.8	29.49
5.82	30.12
5.82	30.27
5.85	30.5
5.85	31.2
5.9	31.21
5.9	31.48
5.9	31.66
5.9	31.75
5.9	32.1
5.9	32.25
5.95	32.29
5.95	32.6
5.95	33.35
5.95	33.79
5.98	34.4
6	34.5
6	34.88
6	35
6	35.22
6	35.51
6	35.6
6	35.67
6.05	35.7
6.05	36.03
6.05	36.2
6.08	36.25
6.1	36.3
6.1	36.3
6.1	36.55
6.1	36.58
6.1	37.3
6.15	37.4
6.15	37.45
6.2	37.5
6.2	37.58
6.2	37.65
6.2	37.65
6.2	37.91
6.25	38
6.25	38
6.25	38.04
6.26	38.57
6.27	39
6.3	39.4
6.3	39.65
6.3	39.91
6.3	39.98
6.33	40.2
6.35	40.4
6.35	40.47
6.38	40.7
6.4	40.75
6.4	40.89
6.4	41.45
6.4	41.7
6.4	41.7
6.4	41.99
6.4	42.16
6.43	42.2
6.45	42.25
6.45	42.6
6.5	43.3
6.5	43.4
6.5	43.5
6.5	44
6.55	44.3
6.59	44.4
6.6	44.9
6.6	45.2
6.6	45.75
6.6	46.2
6.6	46.42
6.6	46.95
6.6	47
6.6	50.15
6.6	51.19
6.6	62.9
6.65
6.66
6.68
6.68
6.7
6.7
6.7
6.7
6.7
6.7
6.7
6.7
6.72
6.72
6.75
6.77
6.8
6.8
6.8
6.8
6.82
6.9
6.9
6.9
6.95
6.95
7
7
7
7
7
7
7
7
7
7.05
7.1
7.1
7.1
7.1
7.1
7.1
7.15
7.15
7.15
7.22
7.25
7.25
7.25
7.25
7.3
7.3
7.3
7.35
7.35
7.35
7.35
7.4
7.4
7.4
7.4
7.4
7.4
7.45
7.45
7.45
7.5
7.5
7.55
7.55
7.6
7.6
7.6
7.6
7.6
7.6
7.6
7.61
7.63
7.63
7.65
7.65
7.65
7.7
7.74
7.76
7.8
7.8
7.8
7.81
7.82
7.84
7.85
7.85
7.9
7.95
7.95
7.98
7.98
8
8
8
8
8
8
8
8
8
8
8.05
8.05
8.05
8.1
8.1
8.15
8.15
8.15
8.2
8.2
8.2
8.25
8.3
8.32
8.35
8.35
8.35
8.4
8.45
8.45
8.45
8.49
8.5
8.5
8.5
8.5
8.55
8.55
8.55
8.6
8.6
8.65
8.7
8.7
8.7
8.71
8.75
8.75
8.75
8.78
8.8
8.8
8.8
8.8
8.8
8.8
8.81
8.82
8.85
8.9
8.9
8.9
8.9
8.9
8.9
8.9
8.9
8.9
8.9
8.9
8.92
8.92
8.94
8.95
8.95
9
9
9
9.02
9.04
9.07
9.08
9.08
9.1
9.1
9.1
9.11
9.15
9.15
9.15
9.2
9.2
9.2
9.2
9.22
9.24
9.25
9.28
9.3
9.3
9.3
9.3
9.3
9.35
9.35
9.4
9.4
9.4
9.4
9.4
9.45
9.45
9.5
9.5
9.5
9.5
9.5
9.5
9.5
9.5
9.55
9.55
9.59
9.6
9.6
9.61
9.62
9.63
9.65
9.65
9.68
9.7
9.7
9.7
9.7
9.7
9.7
9.7
9.72
9.74
9.75
9.75
9.75
9.75
9.8
9.8
9.8
9.8
9.8
9.8
9.8
9.8
9.83
9.85
9.85
9.85
9.85
9.9
9.9
9.9
9.9
9.9
9.9
9.96
10
10
10
10
10
10
10
10.05
10.1
10.1
10.1
10.1
10.1
10.1
10.12
10.15
10.2
10.2
10.2
10.2
10.23
10.25
10.29
10.3
10.3
10.3
10.3
10.3
10.34
10.4
10.4
10.4
10.4
10.45
10.5
10.5
10.55
10.6
10.6
10.63
10.7
10.7
10.7
10.7
10.7
10.7
10.7
10.7
10.75
10.8
10.8
10.85
10.85
10.85
10.85
10.88
10.88
10.89
10.9
10.9
10.9
10.9
10.95
10.95
10.95
10.95
10.95
11
11
11
11
11.05
11.05
11.08
11.1
11.1
11.15
11.15
11.15
11.2
11.2
11.2
11.21
11.25
11.29
11.3
11.3
11.3
11.3
11.3
11.3
11.3
11.3
11.35
11.35
11.35
11.4
11.4
11.4
11.4
11.45
11.45
11.5
11.5
11.5
11.55
11.55
11.6
11.64
11.7
11.7
11.75
11.78
11.8
11.8
11.85
11.85
11.86
11.9
11.9
11.92
11.95
12
12
12
12
12
12.03
12.04
12.1
12.1
12.1
12.1
12.1
12.1
12.12
12.13
12.15
12.2
12.2
12.2
12.2
12.2
12.25
12.3
12.3
12.3
12.3
12.3
12.3
12.3
12.35
12.35
12.39
12.4
12.45
12.5
12.5
12.5
12.55
12.6
12.6
12.6
12.6
12.6
12.6
12.6
12.6
12.63
12.65
12.65
12.69
12.7
12.7
12.7
12.7
12.71
12.73
12.73
12.8
12.8
12.8
12.8
12.8
12.85
12.85
12.89
12.9
12.9
12.93
13
13
13
13
13.1
13.1
13.1
13.1
13.1
13.15
13.15
13.15
13.19
13.19
13.2
13.2
13.3
13.3
13.3
13.3
13.35
13.35
13.38
13.4
13.4
13.4
13.4
13.41
13.45
13.5
13.5
13.5
13.5
13.5
13.5
13.5
13.6
13.6
13.6
13.61
13.65
13.7
13.7
13.7
13.7
13.78
13.8
13.8
13.8
13.8
13.8
13.85
13.9
13.91
13.91
13.93
13.95
14
14
14.05
14.05
14.07
14.08
14.1
14.1
14.1
14.15
14.15
14.2
14.2
14.2
14.2
14.2
14.25
14.3
14.3
14.35
14.35
14.4
14.4
14.4
14.45
14.45
14.45
14.45
14.5
14.5
14.5
14.6
14.6
14.6
14.6
14.6
14.6
14.61
14.64
14.65
14.65
14.7
14.7
14.73
14.79
14.85
14.9
14.9
14.9
14.9
14.9
15
15
15
15
15
15.05
15.09
15.1
15.1
15.1
15.1
15.16
15.18
15.18
15.2
15.2
15.2
15.2
15.2
15.2
15.24
15.26
15.3
15.3
15.3
15.3
15.3
15.33
15.39
15.39
15.39
15.4
15.4
15.45
15.48
15.5
15.5
15.5
15.55
15.55
15.6
15.6
15.6
15.61
15.62
15.64
15.65
15.69
15.7
15.74
15.75
15.75
15.78
15.8
15.8
15.9
15.99
16
16
16
16
16.1
16.1
16.1
16.1
16.12
16.19
16.2
16.2
16.22
16.22
16.24
16.3
16.3
16.3
16.35
16.4
16.4
16.48
16.5
16.5
16.5
16.55
16.56
16.6
16.6
16.6
16.65
16.67
16.69
16.7
16.7
16.7
16.75
16.85
16.85
16.85
16.85
16.9
16.9
16.9
16.94
16.95
16.98
17
17.03
17.1
17.1
17.1
17.1
17.1
17.15
17.15
17.2
17.23
17.25
17.3
17.3
17.3
17.35
17.35
17.35
17.4
17.49
17.49
17.57
17.6
17.68
17.69
17.7
17.7
17.7
17.7
17.75
17.78
17.8
17.8
17.8
17.85
17.85
17.9
17.9
17.95
17.95
17.95
18
18
18
18
18
18
18.03
18.1
18.15
18.15
18.2
18.2
18.25
18.25
18.26
18.3
18.3
18.4
18.4
18.4
18.5
18.5
18.55
18.6
18.7
18.7
18.72
18.75
18.8
18.85
18.85
18.85
18.85
18.9
18.9
18.95
18.99
19
19
19.03
19.03
19.05
19.08
19.1
19.1
19.1
19.1
19.18
19.2
19.25
19.25
19.3
19.3
19.3
19.32
19.35
19.4
19.4
19.57
19.65
19.7
19.75
19.85
19.9
19.9
19.9
20
20
20.1
20.15
20.18
20.2
20.2
20.25
20.3
20.3
20.3
20.34
20.4
20.4
20.42
20.5
20.5
20.6
20.61
20.65
20.65
20.7
20.7
20.7
20.7
20.72
20.8
20.8
20.95
20.95
21
21
21
21
21.05
21.09
21.12
21.12
21.2
21.24
21.3
21.33
21.35
21.4
21.48
21.5
21.5
21.55
21.6
21.7
21.7
21.7
21.76
21.8
21.8
21.82
21.85
21.9
21.9
21.9
22
22.09
22.1
22.1
22.2
22.2
22.25
22.25
22.28
22.3
22.35
22.35
22.52
22.58
22.6
22.6
22.6
22.65
22.7
22.7
22.75
22.8
22.9
22.95
23
23
23
23.15
23.15
23.23
23.23
23.33
23.35
23.35
23.4
23.45
23.5
23.51
23.6
23.6
23.67
23.7
23.78
23.85
23.9
24
24
24.05
24.1
24.14
24.19
24.25
24.34
24.35
24.4
24.4
24.4
24.58
24.62
24.65
24.75
24.83
24.97
25
25.1
25.15
25.2
25.3
25.4
25.42
25.5
25.5
25.5
25.5
25.59
25.65
25.65
25.65
25.7
25.8
25.8
25.85
25.86
25.9
25.9
25.9
25.93
25.95
25.96
26.1
26.12
26.18
26.18
26.18
26.25
26.25
26.27
26.4
26.4
26.4
26.45
26.48
26.5
26.63
26.7
26.7
26.7
26.71
26.75
26.8
26.8
26.8
26.8
26.86
26.9
26.95
27
27
27.03
27.2
27.3
27.3
27.4
27.4
27.4
27.5
27.51
27.6
27.61
27.63
27.78
27.85
27.88
27.95
28.09
28.17
28.2
28.2
28.21
28.3
28.4
28.4
28.47
28.5
28.6
28.6
28.65
28.7
28.7
28.91
29
29
29
29
29.02
29.1
29.1
29.18
29.2
29.2
29.3
29.3
29.6
29.66
29.67
29.7
29.85
29.85
29.95
30
30.13
30.18
30.19
30.37
30.4
30.48
30.52
31.07
31.1
31.28
31.5
31.6
31.71
32.28
32.49
32.5
32.5
32.55
32.57
32.6
32.6
32.69
32.89
32.9
32.9
32.95
33.19
33.2
33.2
33.5
33.7
33.75
33.8
33.8
33.9
34.1
34.15
34.25
34.6
34.7
34.77
34.95
35.05
35.3
35.3
35.3
35.4
35.5
36.19
36.2
36.38
36.45
36.48
36.52
36.6
36.8
36.9
37
37.09
37.25
37.5
37.5
37.6
37.9
37.95
38.3
38.4
38.75
38.8
38.95
39.1
39.23
39.7
39.8
40.15
40.16
40.5
40.5
40.55
40.6
40.6
40.63
40.68
40.95
41.6
41.6
41.67
41.99
42.1
42.1
42.49
42.9
44.9
45.33
46.5
47.7
47.8
47.85
48.67
49.4
49.4
49.86
50.7
50.8
50.89
51.4
51.9
53.3
53.49
53.49
53.5
55.25
55.3
55.6
55.9
56.5
56.95
58.56
58.7
60.49
60.8
62.1
62.65
63.69
63.92
64.09
64.968
65.75
65.91
66.7
67.8
68.15
69.5
69.99
70.93
71.28
76.52
78.8
79.4
79.8
80.91
80.98
83.54
83.87
84.88
85.21
86
87.8
91.1
98.2
99.35
99.7
104.84
105.3
108.8
109.69
110.3
112.5
114.37
118
123.31
123.61
128.7
134.68
135.31
143.19
175.99
